# Supplementary material
Source: PubMed Central journal article supplement (PMC4922798)
Supplement: NIHMS793054-supplement-SI.pdf [file NIHMS793054-supplement-SI.pdf]

## Supporting Information

### Biochemical and Structural Basis for Controlling Chemical Modularity in Fungal Polyketide Biosynthesis

Jaclyn M. Winter,<sup>‡,†</sup> Duilio Cascio,<sup>§</sup> David Dietrich,<sup>||</sup> Michio Sato,<sup>⊥</sup> Kenji Watanabe,<sup>⊥</sup>  
Michael R. Sawaya,<sup>§</sup> John C. Vederas,<sup>||</sup> Yi Tang<sup>\*,‡,Δ</sup>

#### Corresponding Author

Yi Tang

Department of Chemical and Biomolecular Engineering

Department of Chemistry and Biochemistry

University of California, Los Angeles, CA 90095

[yitang@ucla.edu](mailto:yitang@ucla.edu)

## Table of Contents

|                                                                                                    | Pages |
|----------------------------------------------------------------------------------------------------|-------|
| <b>Experimental Procedures</b>                                                                     |       |
| Strains                                                                                            | S3    |
| Chemicals and spectral analysis                                                                    | S3    |
| General molecular biology experiments                                                              | S3    |
| Construction of SAT and CazM mutants                                                               | S3    |
| Cazaldehyde A ( <b>10</b> ) reduction assay                                                        | S4    |
| <b>Supplementary Tables</b>                                                                        |       |
| Table 1. Primers used in study                                                                     | S5    |
| Table 2. List of enzymes constructed                                                               | S6    |
| Table 3. Spectral assignments of cazaldehyde A ( <b>10</b> )                                       | S16   |
| Table 4. Spectral assignments of cazaldehyde B ( <b>12</b> )                                       | S21   |
| Table 5. X-ray data collection and refinement statistics for the SAT domain                        | S30   |
| <b>Supplementary Figures</b>                                                                       |       |
| Figure 1. Corrected gene sequence of <i>cazM</i>                                                   | S6    |
| Figure 2. Reconstitution of CazM                                                                   | S9    |
| Figure 3. Amino acid sequence of CazM highlighting the SAT domain                                  | S9    |
| Figure 4. SDS-PAGE of heterologously expressed <i>caz</i> proteins                                 | S11   |
| Figure 5. <sup>1</sup> H NMR and <sup>13</sup> C spectra of SNAC ester <b>11</b>                   | S12   |
| Figure 6. Mass spectral data of SNAC ester <b>11</b>                                               | S13   |
| Figure 7. In vivo synthesis of <b>10</b> and <b>12</b>                                             | S14   |
| Figure 8. Mass spectral data for <b>10</b> and <b>12</b>                                           | S15   |
| Figure 9. <sup>1</sup> H NMR spectrum of <b>10</b>                                                 | S17   |
| Figure 10. <sup>13</sup> C NMR spectrum of <b>10</b>                                               | S18   |
| Figure 11. <sup>1</sup> H- <sup>1</sup> H COSY NMR spectrum of <b>10</b>                           | S19   |
| Figure 12. <sup>1</sup> H- <sup>13</sup> C HMBC NMR spectrum of <b>10</b>                          | S20   |
| Figure 13. <sup>1</sup> H NMR spectrum of <b>12</b>                                                | S22   |
| Figure 14. <sup>13</sup> C NMR spectrum of <b>12</b>                                               | S23   |
| Figure 15. <sup>1</sup> H- <sup>1</sup> H COSY NMR spectrum of <b>12</b>                           | S24   |
| Figure 16. <sup>1</sup> H- <sup>13</sup> C HMBC NMR spectrum of <b>12</b>                          | S25   |
| Figure 17. Cazaldehyde A ( <b>10</b> ) reduction assay                                             | S26   |
| Figure 18: Aligned structure of apo and hexanoyl-bound SAT                                         | S27   |
| Figure 19: Structures of malonyl-Co:ACP transacylases, acyltransferases and trans-acyltransferases | S28   |
| <b>Supplementary References</b>                                                                    | S32   |

## Experimental Procedures

### Strains

*Chaetomium globosum* CBS 148.51 was obtained from The American Type Culture Collection. *Escherichia coli* BL21 (DE3) was used for expressing the standalone SAT domain from CazM. *Saccharomyces cerevisiae* BJ5464-NpgA<sup>1</sup> (*MAT $\alpha$  ura3-52 trp1 leu2- $\Delta$ 1 his3 $\Delta$ 200 pep4::HIS3 prb1 $\Delta$ 1.6R can1 GAL*), which contains a chromosomal copy of the phosphopantetheinyl transferase NpgA,<sup>2</sup> was used for expressing the NR-PKS CazM, the HR-PKS CazF<sup>3</sup> and for the in vivo production of calzaldehyde A (**10**) and B (**12**).

### Chemicals and spectral analysis

All solvents and other chemicals used were of analytical grade. NMR spectra were obtained on Bruker 400-MHz (100 MHz for <sup>13</sup>C) and 500-MHz spectrometers and a Varian VNMR5 500-MHz spectrometer (125 MHz for <sup>13</sup>C). Mass spectra were recorded on an Agilent 6220 oaTOF and a Shimadzu 2010EV liquid chromatography mass spectrometer.

### General Molecular Biology Experiments

PCR reactions were carried out using AccuPrime Pfx DNA polymerase (Invitrogen). Restriction enzymes were purchased from New England Biolabs and used according to the manufacturer's instructions. pCR®-blunt (Invitrogen) was used to construct recombinant DNA products and DNA sequencing was performed by Retrogen and Laragen, California, USA. DNA manipulation using standard techniques<sup>4</sup> were performed in *E. coli* TOP10 (Invitrogen) and *E. coli* XL1-Blue (Stratagene). RNA extraction was performed using a RiboPure Yeast kit (Ambion) and ImProm-II Reverse Transcription System (Promega) was used to synthesize complementary DNA (cDNA) from total RNA using specific primers.

### Construction of SAT and CazM mutants

Site-directed mutagenesis on the active site Cys155 and His277 residues was carried out using a complementary PCR primer method. The wild-type SAT-containing pHis8 vector pJWT-49 was used as template with AccuPrime Pfx (Invitrogen) as the polymerase. Primer pairs SAT\_C155A\_F and SAT\_C155A\_R were used for the Cys to Ala mutation, primer pairs SAT\_C155S\_F and SAT\_C155S\_R were used for the Cys to Ser mutation, and primer pairs SAT\_H277A\_F and SAT\_H277A\_R were used for the His to Ala mutation (Table S1). After a denaturing step of 95 °C for 30 seconds, 14 rounds of 95 °C for 30 seconds, 55 °C for one minute and 68 °C for six minutes was carried out followed by an incubation at 37 °C for two minutes. The reaction was digested with DpnI (New England Biolabs) and transformed into *E. coli* TOP10 chemical competent cells (Invitrogen). After sequence verification, the expression vectors pJWT-59 (Cys155Ala), pJWT-71 (Cys155Ser) and pJWT-75 (His277Ala) were transformed into *E. coli* BL21 (DE3) electrocompetent cells and protein expression and purification was performed as described above for wild-type SAT (Protein yields can be found in Table S2 and SDS-PAGE analysis in Figure S4).

The SAT domain makes up the majority of piece one used for the reconstitution of CazM (1,194 out of the 1,313 bp). Therefore, to introduce the C155A, C155S and H277A mutations independently into intact CazM, the mutant SAT expression vectors pJWT-59, pJWT-71 and pJWT-75 were used as template to amplify the slightly shorter piece one carrying the respective

point mutation. Primer pair CazM\_P1\_F was used with CazM\_MT\_R for all constructs (Table S1). Pieces 2–5 were amplified as described previously and the five exons were co-transformed with the 2  $\mu$ M URA3 expression plasmid into *S. cerevisiae* BJ5464-NpgA as described previously to yield plasmids pJWT-66 (CazM C155A), pJWT-73 (CazM C155S) and pJWT-80 (CazM H277A). Protein expression and purification was performed as described for wild-type CazM. Protein yields are found in Table S2 and SDS-PAGE analysis in Figure S4.

### **Cazaldehyde reduction assay**

To explain if the conversion of **10** into **12** was enzymatic or spontaneous, a variety of in vitro assays were conducted. The first assay assessed whether the reduction occurred non-enzymatically. In a 100  $\mu$ L reaction, 2 mM NADPH was incubated with 0.2  $\mu$ M **10** in 100 mM phosphate buffer pH 7.4 at room temperature for 8 hours. After the incubation, the reaction was extracted two times with 200  $\mu$ L 99% ethyl acetate:1% acetic acid and the organic layer was dried by speedvac. To identify if the SAT domain mediated the reduction, 25  $\mu$ M of the wild-type standalone protein was incubated at room temperature in a 100  $\mu$ L reaction containing 0.2  $\mu$ M **10**, 2 mM NADPH and 100 mM phosphate buffer pH 7.4. The reaction was incubated for 8 hours and then extracted as described previously. The reducing activity of CazM was evaluated by incubating 25  $\mu$ M of protein in a 100  $\mu$ L reaction with 2 mM NADPH and 0.2  $\mu$ M **10** in 100 mM phosphate buffer pH 7.4. The reaction was incubated at room temperature for 8 hours and then extracted as described above. All extracts were dissolved in 20  $\mu$ L MeOH and analyzed on a Shimadzu 2010 EV LC-MS with a Phenomenex Luna 5 $\mu$  2.0 x 100 mM C18 column using positive and negative mode electrospray ionization with a linear gradient of 5–95% MeCN:H<sub>2</sub>O over 30 minutes followed by 95% MeCN for 15 minutes and a flow rate of 0.1 mL/min (Figure S17).



**Supplementary Table 2. List of enzymes constructed in this work**

| Enzyme            | Plasmid Name | Expression host                  | Expression Level (mg/L) |
|-------------------|--------------|----------------------------------|-------------------------|
| CazM              | pJWT-37      | <i>S. cerevisiae</i> BJ5464-NpgA | 2.2 mg/L                |
| CazF 2 $\mu$ MTrp | pJWT-41      | <i>S. cerevisiae</i> BJ5464-NpgA | 8 mg/L                  |
| CazM's SAT        | pJWT-49      | <i>E. coli</i> BL21(DE3)         | 43 mg/L                 |
| SAT C155S         | pJWT-71      | <i>E. coli</i> BL21(DE3)         | 53 mg/L                 |
| SAT C155A         | pJWT-59      | <i>E. coli</i> BL21(DE3)         | 40 mg/L                 |
| SAT H277A         | pJWT-75      | <i>E. coli</i> BL21(DE3)         | 60 mg/L                 |
| CazM C155A        | pJWT-66      | <i>S. cerevisiae</i> BJ5464-NpgA | Not solubly expressed   |
| CazM C155S        | pJWT-73      | <i>S. cerevisiae</i> BJ5464-NpgA | <1.0 mg/L               |
| CazM H277A        | pJWT-80      | <i>S. cerevisiae</i> BJ5464-NpgA | 2 mg/L                  |

**Supplementary Figure 1. Correct DNA sequence of *cazM* (CHGG\_07645–07647, new GenBank accession KP764718).** After the gene was reconstituted, sequencing revealed that the original genome contained three extra bases. When these extra bases are removed, the correct DNA sequence of *cazM* does not contain any introns. The three extra bases are capitalized, underlined and highlighted in red

atgatttccgtagccgacctcgattatgcctcccgcaaattccagcattttcctctttgccccccatgtcgcgactttcaccaagcagtcctcatggacaagctcgtccggccactcgcggctagcgcaccacaggactggatcctagataccggttgcctggtctgccaacatactgggatgccctggcgggtcaagatacccaacatagggaacgcaattccgggcccgcgtcaactaactgatctcgacacatgggtccggcacggcgagggcgacgtgacgcaggacgatgccaccctcccagcatcgtcgtcggccccttgggtggtactcatacagctcaccagtactggcgtacctcgagctcacacgaccggaccacttagaggactcggcggacttacaagcggacgtgggtcaccgccagaccagccggggAgccaaagtcgagactttgggcttctgtgccgggctactagccgccgtggctgtggctagcgcggtaatcgacaagagttccaaaaatatggcgccgtagcgggtgcggctagccatgatggcgggtgcgctcatcgatggccaagagggcgcgcgacaagggcgaccccgcgacggcggtccggtgtcctatgcatagcatggcgcggccagaagccgggagaggaggctgcgcgcatagtcaaggacctgaacccaaaccgctacttcgccgtgctttacgacgaggcccgccaccgtgaccacaaccgacgcacggctcccagcctcgtgaaccggctccgggctgctgatgtcacgggtggccgagattgggatcaaggccgcatccacagccccgactcggaaaggaagaacaactgatctactcgtggacctgtgcaagtcattcgaggatctgcaatatgctgacgccgcctctctcgcgttggcgacctacaacaacgaggetgaaggcaggcctgtgtcgcgggatcgcgtaatatgaccgagatgggtgatccgcgccatcttagtgaaccagtgcaactgggtatgggacgtttaagggtgctacggaaggcaggagccctttagtgcacctgggctggagcgtagtgtgccaccgacgctgatgcgagctctcggacctaccaagtgcactacgaggacctggcggacaacggcatccccagctccgcagtctcctcccagggcagtcattgaaaccaaccacagccacaacagcagcaagatacaaccccgccgaaaatcctcgagaacgacaaagacgccatcgccgtcgtcggcatgtccatcaagacagccggcgccgacgacctgacgaattcgtggagatgctcaagacgggcccgggtcccagcacgagcccgtagcgcgggagcggctcatgcaacgacatgctcttccgggcccgcggacagcagcccaaccacaagtaactacggctgcttcatccgggactcggagcgttcgaccaccgcttcttcaagegcagcccgcgcgagtcggccgcatggacccgcagagccgctggccatgcaggccgctaccaggcggctcagcagtcgggctacttcaccgaaacaaccgcccgcgcccagggccgcgacaagaagcagctgggctgtacctgggggtgtgcggtatggactacgaccacaacagcacgtgccacgagccgagcgccttcacggcgacgggggcgctgcgcagcttcatcagggccgggtgtcgcactatttgggtggacgggcccgtccatgaccttcgacacggcctgctcgtcttcggccgtggccatcc

acacggcctgcccgaacctgctctcgggagagtgacggcgggcgctggccggcgggcgccaacaccatcac  
cagcatgctttgggtccagaacctcagcgcgggagcttcgctcagcccagggccagtgcaagcccttt  
gacgacgccgcgacggctactgccgcgccgagggcatggcctttgtgttttgaagaagctgtccgacg  
cctgctgcgacggcaaccccgctgctggcaaccatccccagcagcggcgtctaccaaaaccagaacagcac  
ccccctgttcgtgcccactccccctccctctcgatgctcttctccgacgtgatgcggcaggccggggtc  
gcaccgcgcgacatctcgtggtcgaagcgcacggcagggcagcccgtggggcagccggccgagtacg  
agagcatccgcacggcgtggggcgggccgcgctgggacgcaccaagccgctgccgatcgggtcgtcaa  
gggacacatcgggacacggagggtgctcgggggcatcgcgctgatcaaggtgatcatgatgatgctgc  
ggcggttcatcccggcagggccagcttcaaccaagatgagccacaacatcgcggtgcgccggacgaca  
tgatggaggtggtgacacagctgcgcccctggggccagccgcacaagatcgcctcctcaacaactacgg  
cgctgcggtccaatgccagcctgatcgtcgcgacggcggcccccggcctgcgcgacccgacgctggc  
gcccataacacccccgagggggcggtatccgttctggatcgcggggctcgacgcccgggcaatttccg  
cctacgggctaagctgatccgctacctcccgctcgtctcccaggacattcccacactcgcgacatctc  
ctttagcatgaaccggcagtccaaccgcgccctagcgcaggggttcgtgttcagcagccggctcgggtggc  
gagctgcaagagaagctggcgcagggcgccggagcggctgggaaggaggccgcgctgggtgggcatcg  
agccggtcagggccgagcggcccggtgctgtgctttggcgggcaggtgtcgtgttcgtggggctgga  
cagggcgtgttcgacagcgcggccgtactgcggcggcacctggacgagtgcgatgcccgcgtgacggcg  
ctcggcctcgacagcatctaccgggcatctttgagcgggagccggtacaagacacgggtcaagctgcaga  
cgatgctgtttgctatgcagtatgcctctgcgaagagctggatggactgcgggctgcaaggcaagggtggc  
cgccgttgtgggcccacagcttcggcgagatcacggcgtgtgctgctggccggcgtgcttagcctggaggat  
accatcaagcttgtggcgccagggccagactgggtgctgattcgtgggggtcccgatccgggtgccatga  
tggctgttgaggccgacgaaggcctcgtccgtgagctgttgacaggaagcgaaccgcagctcggatgggtc  
ggccggcattgcttgttacaacggaccgcagctttaccctcgcggatcgaccagcgcgggtggatgctg  
gtgcagggcaccatgtcggctgacgccaagttcaaagccatcaggagcaagcggctgaacgtgacgaacg  
ccttccactccgcccctgtcagaaaactgggtggattccctgggacaggtcggaaaggagctgacgttcca  
cccaccaccatccccCgtggaacgggcaacggaaacgcctttgacgcgccctcgatggactggacatt  
cgtgcctcgcacatgcgggagccgtattcttcaaccagccgtgcagcggctggccaagcaaacccg  
caagccatctttctgaagcgggctccaactcgaccatcaccatcatggcaagcagggcgctcgtcaga  
gccagacctcccctccggacgccatcatttccaagcgtctccatcaccaccgcagggcttcgacgg  
gctgaccgacgccacggctgcacctgtggaagcaaggtctgcgctgccttctgggcccaccacgcctg  
cagacgctcgaatacgcgcagctgctcctacccccctaccaattcgacacatccccctcctcgcgacact  
ggctcgagatgaagtcaccccagaaggtgatcgacaaagccgtaaaggcactcgtagcggcaggaacacc  
gcaccaactgccccagaaccaaaccatcgacccccaaaaccctccccctatggacctcgtcggctacaa  
gacgcgccgaccaacaaaacggcgcgcttccgcatcaacaccgagtcggcccagtaaacacctacgtgc  
tcagccacgtgatcgccaaaaccgcgccatctgcccgggacagctcgaatgcgacatgatgatcgaggc  
gctgttcagctcgcacggcagcccaggaaaacggctctgcagcccagatccgcgacctggtcaaccac  
acgcccctctcgtcgcacccctcgcgcaccgtctacctggagctgacggcgtgtacaagaagcgcacgc  
agtggagcgcgcatctcctcagcgtcgccaacggcggcgggcgatgccataaccgcgacgcacgcgga  
ggcgcggtcgggctgcgcgcggcggcgatgcccattatctgctgagtttgccagtttgagcggctg  
gttagtcatgggcggtgctcgcgagttgcttgggttggggctggatgtggagggggtggaggtgctgcagg  
gtcgtgggggtgaccggcgcttgatccgggtgggtgagtatgggtgaggtgtaccgtggcgctgcgctacct  
gggtgggcccggcaacgagtgctgcggccatgtgcagctgcccgcggcaccgtggggatacgtgggtg  
gatgtcgcgttgagtgacagtttcagccaggtgggtgggttgtgggtgaatttgatgacggatgtaccgc  
cgggggatatgtacattgcgacggggtgtgaggtgacgatgcccgcggcgggcccacggcgcgggggtga  
gggggatgtgtggcatgtgtatggccgccatgcccgcagagcgcacaaggcgtacacgacggatctgttt

gtgtttgatgcccgcgaccgggtcgctcgttgaggtcatggtgggctgcagtatgggcccgggtggccaagg  
cctcgatgagccggatgctggcgcatgactacgcatgaaacgggtggtgcccaccaaggcatcgttacc  
gcagctgccggcgacgaattcttcccctccagctaccgctccggcccccgccatggctggtgctgagggc  
agccgtaactccaagaagcggagcaagaagaccgaaaagaaggaggccaagcccaaaaagacacaaaagg  
attccggatggcgagacattaccgaagaggtgcgcaaccttgtggctcacgtgtccggcattgaagccag  
cgagatcgggctcgactcggaaatggccgactttggtatcgattccctgatgggaatggagctgggccc  
gaagtcgagttgacgttcaagtgaagctggaccaggccgaacagatggaggccacgagctctgcgcaagt  
ttgtggcggttgtggccaaggctctctttggtactgatcagcccgtgaggtggaggacgaagccagtga  
agctgaagacgaagacgatgatgattcatcctccactgggtgaaggaggacatggctcggagccaagcca  
gaagacggaagcaagagtcctctggtttgcagacgccgattcgagcagctacaccccccgccggaga  
aagcccagaaggccgggcccgtgcccaggcaacctaaagcccctaaacgcaccaacggcgccgagccgt  
gagcaacctggtactatcgcccgcgacgtgctcgagccttcggcgaggtgaagatggccaccgacagc  
ctcatgcccgaatacgagatcgacaagacggaaaggacctccttggggcagcaaccgtctctgtgccc  
cgctggtggtggaggccctcgacgagctaggctgcccacccgacccgcccgggcccagccactcga  
acgggtgccgttcctcccgcagcagccgcccctgatgcagtgcgtgtacgagttcctcgagcgcgacgcg  
cggctcatcgacatcgacgtcgcgagcggccagctgacgcgcacgcacgtggcggcgccgcgcaagacga  
gccaggccatcctcgaggacctgctgaccagccagcccagttcgcctggtggccaaccggctcgcctacca  
cgccggcaagcagctggcgggggtgctcagcggcaagacggacggcatccgcgtgctcttcggcagcccc  
gagggcccgcgaggtgacggcggccatgtactgcgagcacccttcaaccgcatgagctaccggcagatga  
gagcagtggtggaggccctggcggagcgcacccaaagccgcggcggcagggcgagacgttcaagtgct  
cgagatgggcccggcagggaggcaccacgctcgatggcgcgctgttggcatcgctcgaagcgcgc  
ggcatcatgcccgtcgagtacacttttactgacctgtcgcctcgctggtcgccaatgctcgtcggcggt  
tcgggaagatgtatcccttcatgcccgttcgcagtgatgacatcgagaagtcgcccggccgaggagttag  
ggccagcacctggtacttgccagcaatgccatccatgccacgcacaacctggttgtctcggcctcgaat  
gtgcccagggccctgcccggcagcgttcgtaatgattctagagatgaccgaggtggtccccttcatcg  
acctggtctttgggctgctcgaaggtgggtggctattcgatgacggccggaatcacgcagttgtgcccgc  
cgagcactgggaacgtgagctgcacactgcaggttttgggcatggtgactggaccgacgggaacttgccc  
gagaacgcggctcAaaaaggtcattttcgcgatggcttcagaaccccagggtcctcgcctaccaaaagcc  
gccccggagcaaacgatggaactcgaccgaggtgatgtggcgcctcgcacggccgaggcggaaacggcttg  
tgacaaaatactcgaacgcctggggccacgcccagatgcaagccctcgcgccccggcgggaaacaaacca  
aggccagccgaagcgaacaaagcaaatctcggcgcctggttctcgtgaccggcgcgaccggcagcctc  
ggttcgcacctggtgcagaagctggccgagaaccccgaagtcgcccaggtggtgctcctcaaccgtcgca  
gcagcagcggcctctccgcccgtcaagaaacaacaggaggcattcgcacccaggggcatcacgctgtcacc  
cggggcacgcgcgaagtgcgggtcctagacgcccagacacctccaggcccagctggccctcccaccgcac  
gagtacacctggctcctgcaacacggcaccacatcgtgcacaacgcgtggcccatgagcggaaacgcgc  
ccatcagcgccttcgagccccagctgcagggatgaggaacctcctcgacctcgcgcccggagatggccac  
ccgcatgcccgtccaccggttcgcccgtcggcttccagtttgtgctcctcgggggtggtgggctacgcc  
ggggagccgcgcatcctcgaggaccgctgcctcttccggcgcctcctgccagcggttacggcgagggca  
aatgggtggtgagcggctgctggacgacacctgcataagtaccccagccttttcaggcccattggtcgt  
gcccggccgagatctcgggatcgtcgaacagcggtttctggaaacctgtggagcactttgcgttctg  
gtaaagtcggcgcagacctgcggcgtggcccgacttcgacggcgtgctgcagtgattccggtgacc  
actgcgcgagcgtcatggcggatttgttgaagatgggggtcgcggacgcgcggatgcctatccgggtga  
tcacatcgacaaccccgtaggctcagcagtggaaggccatgtcgcgggtggtggcgctgcctcgcacatc  
ccaccgacgcgatcatcccccttttcgagctggatcaagaggggtccgcccgtcgcacttcttgccgaga  
cggagaatccggcggcgcgtctcgttgacttctcgcagaccacttcgagcgcacatgctcttgcggtgccct



gatactagatacgaccaagcgaaggagcactcccagaccatggccaaggagggtcccgtcgaccagac  
ctcgcccgtctatatgtcgcggcttgaagaagatggaattcctcaggtcgtaa

**Supplementary Figure 2. Reconstitution of *CazM* for expression in *S. cerevisiae* BJ5464-NpgA.** The 8,238bp intron-free gene was assembled and inserted into the 2 $\mu$  URA3 vector by *in vivo* homologous recombination. Overlapping regions between two flanking segments of *CazM* ranged from 122-382 bp and overlapping regions between piece 1 and piece 5 with the 2 $\mu$  vector were 35 bp.

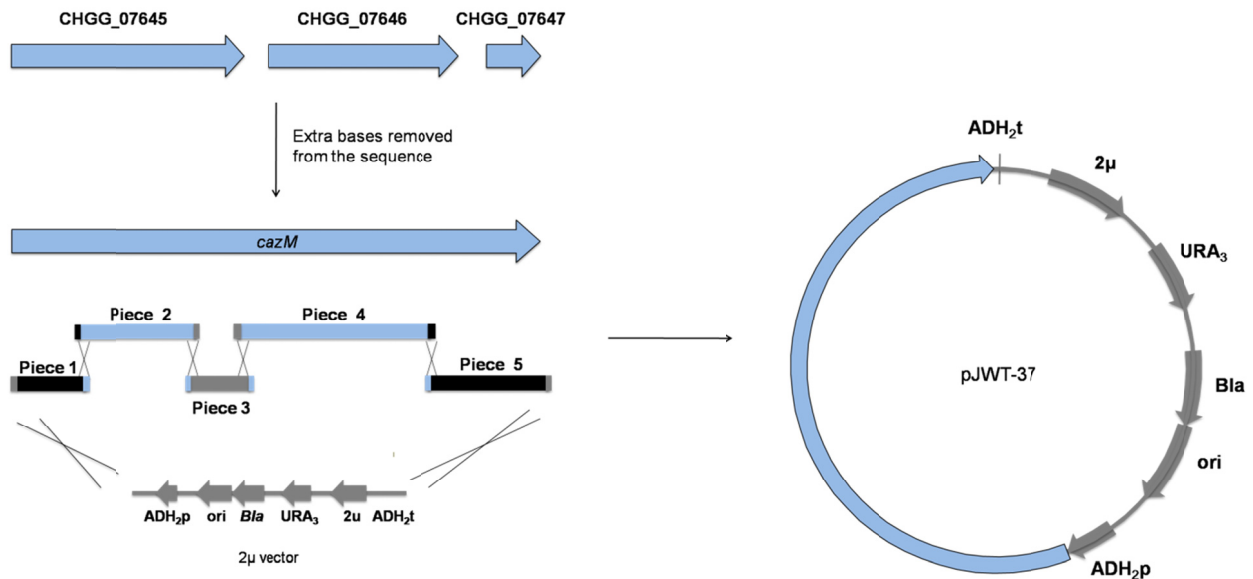

**Supplementary Figure 3. Amino acid sequence of *CazM*.** The SAT domain with part of the KS-linker is highlighted in gray. The GxCxG binding motif is underlined.

MISVADLDYASRKSSIFLFAPHVGTFTKQSMCLKLVRPLAASAHRDWILDTVAGLPTYWDALAVKIPNIGN  
AIPGRRQLTDLDTWFRHGAGDVTQDDATLPSIVVGPLVLIQLTQYWRYLELTRPDHLEDSADLQADVVT  
RQTQPGAKVETLGFCAGLLAAVAVASAGNRQEFQKYGAVAVRLAMMAGALIDGQEARDKATRDGGSVSYA  
IAWRGQKPGEEAARIVKDLNPNAYFAVLYDEARATVTTTRRTAPSLVNRLRAADVTVAEIGIKGRIHSPD  
SERKNNDDLVDLCKSFEDLQYADAASLALPTYNNEAEGRPVSRDRGNMTEMVIRAILVNQC�NWYGTFTKG  
ATEGREPFVVTLGLERSVPPTLMRSLGPHQVHYEDLADNGIPAPQSPRAVIETQPQPQQQDTPPKI  
LENDKDAIAVVGMSIKTAGADDLDEFVEMLKTGRSQHEPVTRERLMHDMFLFRAAADSDPNHKYYGCFIRD  
SDAFDHRFFKRSPRESAAMDQPQSRAMQAAYQAVEQSGYFTETTAAPEGRDKKHVGVYLGVCMDYDHS  
TCHEPSAFTATGALRSFITGRVSHYFGWTGPSMTFDTACSSSAVAIHTACRNLISGECTAALAGGANTIT  
SMLWFQNLASGSFVSPTGQCKPFDDAADGYCRAEGMAFVFLKKLSDAVRDGNPVLATIPSTAVYQONQNST  
PLFVPNSPSLSMLFSDVMRQAGVAPRDISLVEAHGTGTPVGDPAEYESIRTAALGGPRVGRTKPLPIGSKV  
GHIGHTEGASGAIALIKVIMMRGGFIPQASFTKMSHNIAVRPDDMMEVVTLQRPWADPHKIALLNYYG  
ACGSNASLIVAQPPPALRAPTRGAHQHPEGRYPFWIAGLDARAISAYAACLIRYLPSSPQDIPTLADIS

FSMNRQSNRGLAQGFVFSRSVAELQEKLAQAAGAAGKEAAAALVGI EPVRAERPVVLCFGGQVSLFVGLD  
RALFDSA AVLRRHLDECDAAVTALGLDSIYPGIFERE PVQDTVKLQ TMLFAMQYASAKSWMDCGLQGKVA  
AVVGHSFGEITALCVAGVLSLEDTIKLVAARARLVRDSWGPDPGAMMAVEADEGLVRELLQEANRSSDGS  
AGIACYNGPRSFTLAGSTSAVDAVQATMSADAKFKAIRSKRLNVTNAFHSALVEKLVDSLQVVGKELTFH  
PPTIPVERATETPFDAASMDWTFVPRHMREP VFFNHAVQRLAKQHPQAI FLEAGSNSTITIMASRALAQS  
QTSPPDAH HFQAVSITTATGFDGLTDATVALWKQGLRVAFWAHHALQTLE YAQQLLPPYQFDTS PSSRHW  
LEMKSPQKVIDKAVKALVAAGTPHQLPQNQTIDPKTLPLWTFVGYQDAPTNKTARFRINTESAQYNTYVL  
SHVIAQTAPICPGTLECDMMIEALFSLHADAQENGLQPEIRDLVNHTPICVDPSRTVYLELTALYKKRTQ  
WSAHFLSVANGGGDAHNPQTHAEARLRLRAAGDADYLREFAQFERLVSHGRCRELLGLGLDVEGVEVLQ  
RGVYRAFDPVVEYGEVYRGRVRYLVGRGNECAGHVQLPARHRGDTWLDVALSDSFSQVGGGLVWNLM TDVPP  
GDMYIATGCEVTMRAPRATARGE DVWHVYGRHARQSDKAYTTDLFVFDAA TGS LVEVMLGLQYGRVAKA  
SMSRMLARMTTDETVVRTKASLPQLPATNSSPPATAPAPAMAVVEASRNSKKRSKKTEKKEAKPKKTQKD  
SGWRDITEEVRNLVAHVSGIEASEIGLDSEMADFGIDSLMGME LGREVELTFKCKLDQAEQMEATSLRKF  
VAVVAKALFGTDQPAEVEDEASEAEDEDDDDSSSTGEGGTWSEPSQEDGSKESSGLQTPDSSSYTPPPEK  
AQKAGPVPGNLKLPLNAPTAPP AVSNLVLSPADVLA AFGEVKMATDSL MREYEIDKTERTLLAGSNRLCAA  
LVVEALDELGCPIGTAAAGQPLERV PFLPQHGRMLQCVYEFLE RDARLIDIDV ASGQLTRTHVAAPR KTS  
QAILEDLLTSQPEFAVANRLAYHAGKQLAGVLSGKTDGIRVLF GSPREGREVTAA MYCEHPFN RMSYRQMS  
DVVEGLAERIQSRGGTGETFKVLEMGAGTGGTTLVMAPLLASLEARGIMRVEYTF TDLSPSLVANARRRF  
GKMPFMRFAVHDIEKSPA EELRGQHLV LASNAIHATHNLVVSASNVRQALRPDGFVMILEMTEVVPFID  
LVFGLLEGWWLFD DGRNHAVVPAEHWERELHTAGFGHVDWTDGNLPENAVQKVI FAMASEPQGPRLPKAA  
PEQTMELDRGDVAARTAE AERLVTKYSNAWATPRLQALAA RRETNQGPKR NKANLGAVVLVTGATGSLG  
SHLVQKLAENPEVAQVVCLNRRSSSGLSAVKKQQEAFASRGITLSPGARAKLRVLDADTSQAQLALPPHE  
YTWLLQHGHTHIVHNAWPMSGTRPISAFEPQLQGMRNLLDLAREMATRDAVHPFRVGFQFVSSIGVVG YAG  
EPRILEDRVPLSAVLP SGYGEKWCERLLDDTLHKYPSLFRPMVVRPGQISGSSNSGFWNPVEHF AFLV  
KSAQTLRAWPDFDGVLQWIPVDHCASVMADLLKMGVADAPDAYPVYHIDNPVGGQWKAMSPVLAALDIP  
PHAIIPFSSWIKRVRRSPLLAETENPAARLVDFLDSHFERMSCGGLILD TTKAKEHSQ TMAKEGPVDPDL  
ARLYVA AWKKMEFLRS

**Supplementary Figure 4. SDS-PAGE of recombinant caz proteins expressed in this study.** A) CazM and CazM H277A (both 299 kDa) were expressed as C-terminal hexahistidyl-tagged proteins in *S. cerevisiae* BJ5464-NpgA, purified by Ni-NTA agarose affinity resin at 2.2 mg/L and 2.0 mg/L, respectively, and analyzed for purity using a 6% SDS-PAGE gel. B) CazM's SAT domain used for crystallization studies was expressed as an N-terminal octahistidyl-tagged protein (46 kDa) in *E. coli* BL21 (DE3) cells. The His-tag was removed via thrombin cleavage to afford the 44 kDa protein, which was analyzed for purity using a 12% SDS-PAGE gel. C) For in vitro assays, the standalone wild-type SAT domain and mutants were expressed as N-terminal octahistidyl-tagged proteins (46 kDa) in *E. coli* BL21(DE3) cells, purified by Ni-NTA agarose affinity resin to yield between 40-60 mg/L and analyzed for purity using a 12% SDS-PAGE gel. In panels A and B, BenchMark ladder (Life Technologies) was used, whereas Bluestain protein ladder 11-245 kDa (GoldBio) was used for all gels in panel C.

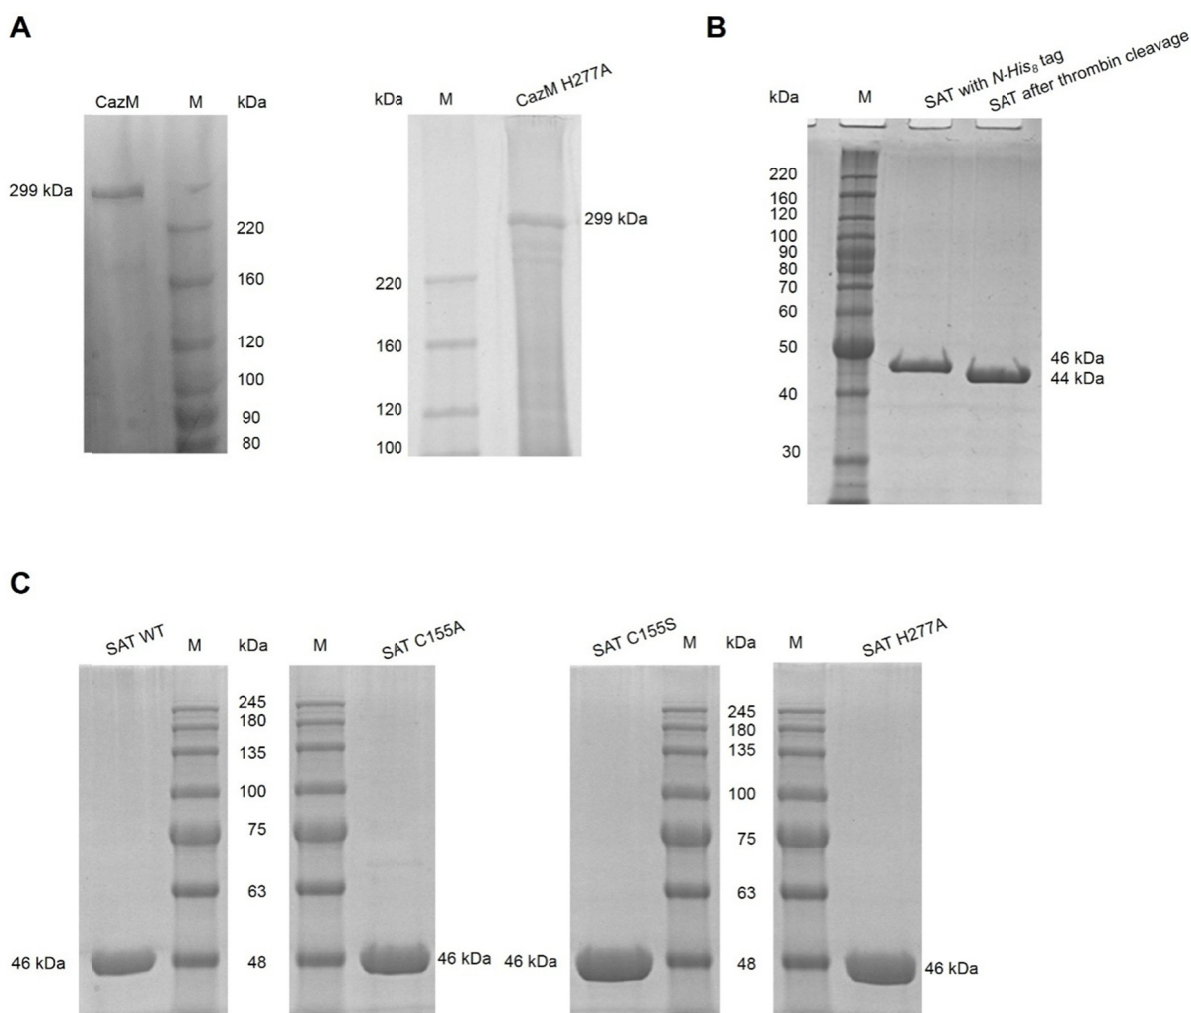

**Supplementary Figure 5.** A)  $^1\text{H}$  NMR spectrum (500 MHz) and B)  $^{13}\text{C}$  NMR spectrum (125 MHz) of SNAC ester (**11**) in  $\text{CDCl}_3$ .

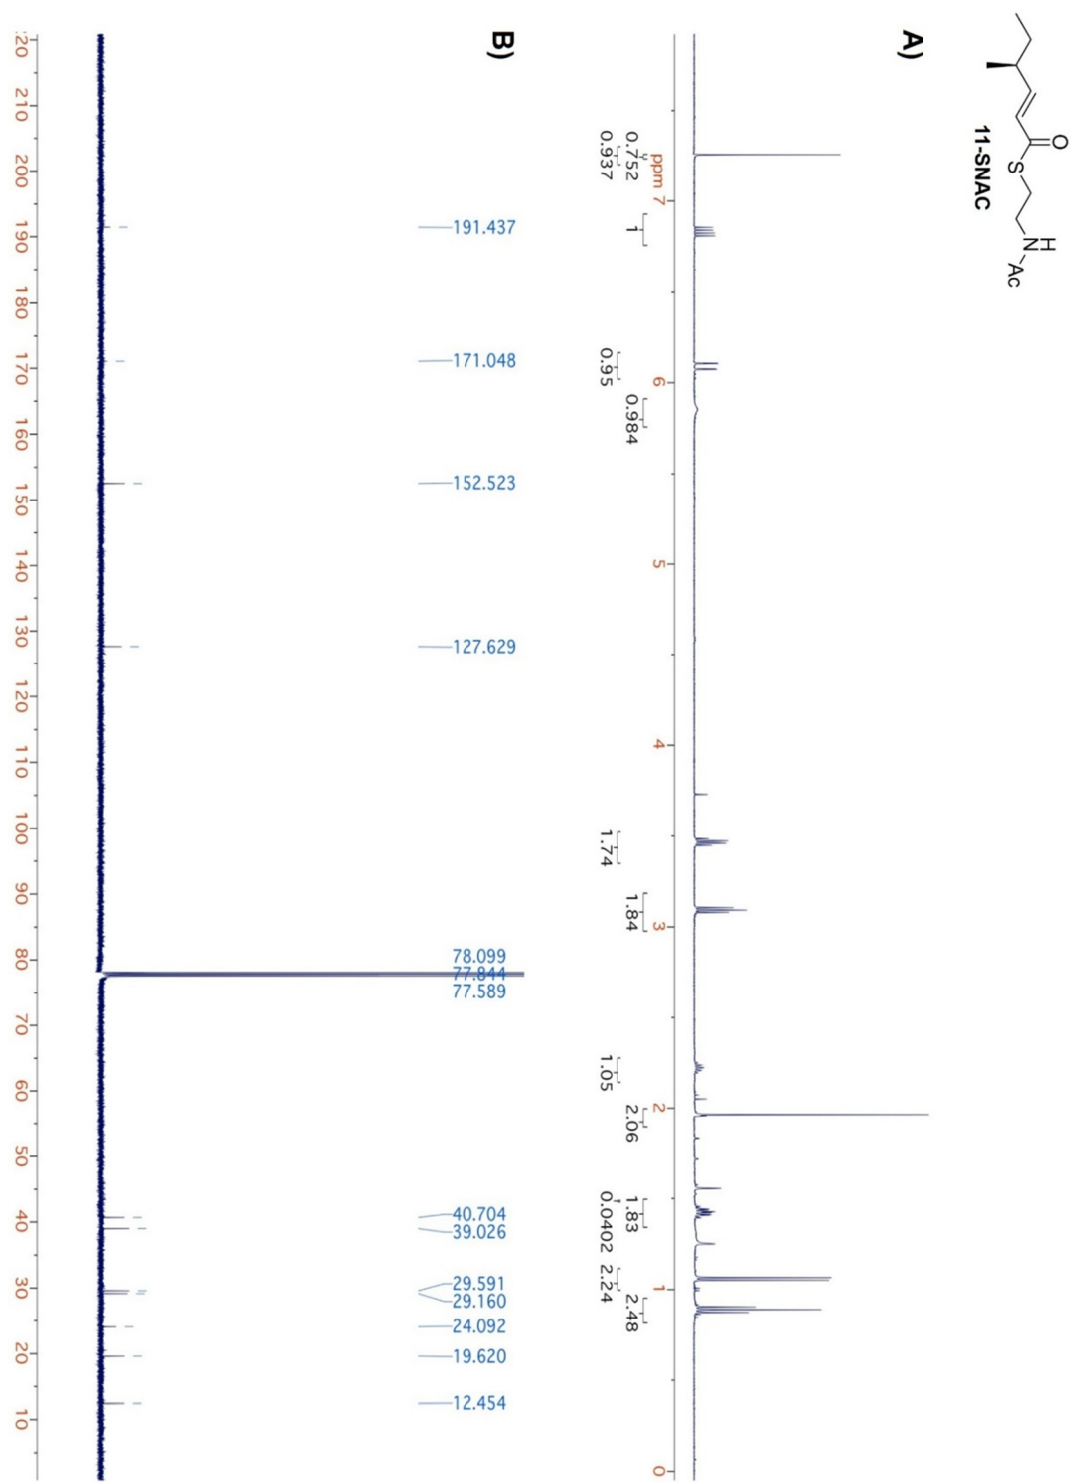

**Supplementary Figure 6. Mass spectrum of SNAC ester (11).**

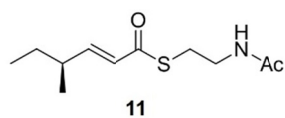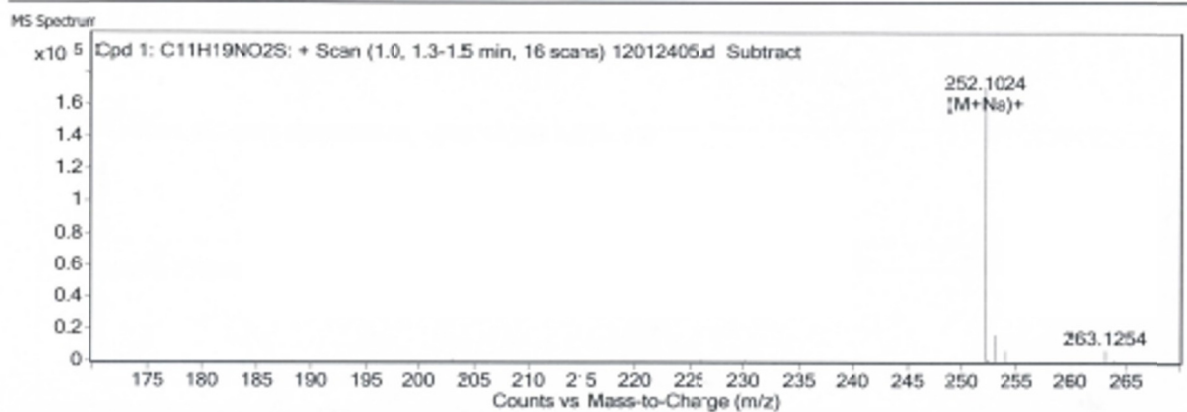

**MS Spectrum Peak List**

| m/z      | Calc m/z | Diff (ppm) | z | Abund  | Formula                                               | Ion                 |
|----------|----------|------------|---|--------|-------------------------------------------------------|---------------------|
| 252.1024 | 252.1029 | -1.76      | 1 | 172276 | C <sub>11</sub> H <sub>19</sub> N Na O <sub>2</sub> S | (M+Na) <sup>+</sup> |

**Supplementary Figure 7.** *In vivo* synthesis of cetaldehyde A (**10**) and B (**12**) in *S. cerevisiae* BJ5464-NpgA. HPLC traces are shown in the same scale and at  $\lambda = 290$  nm.

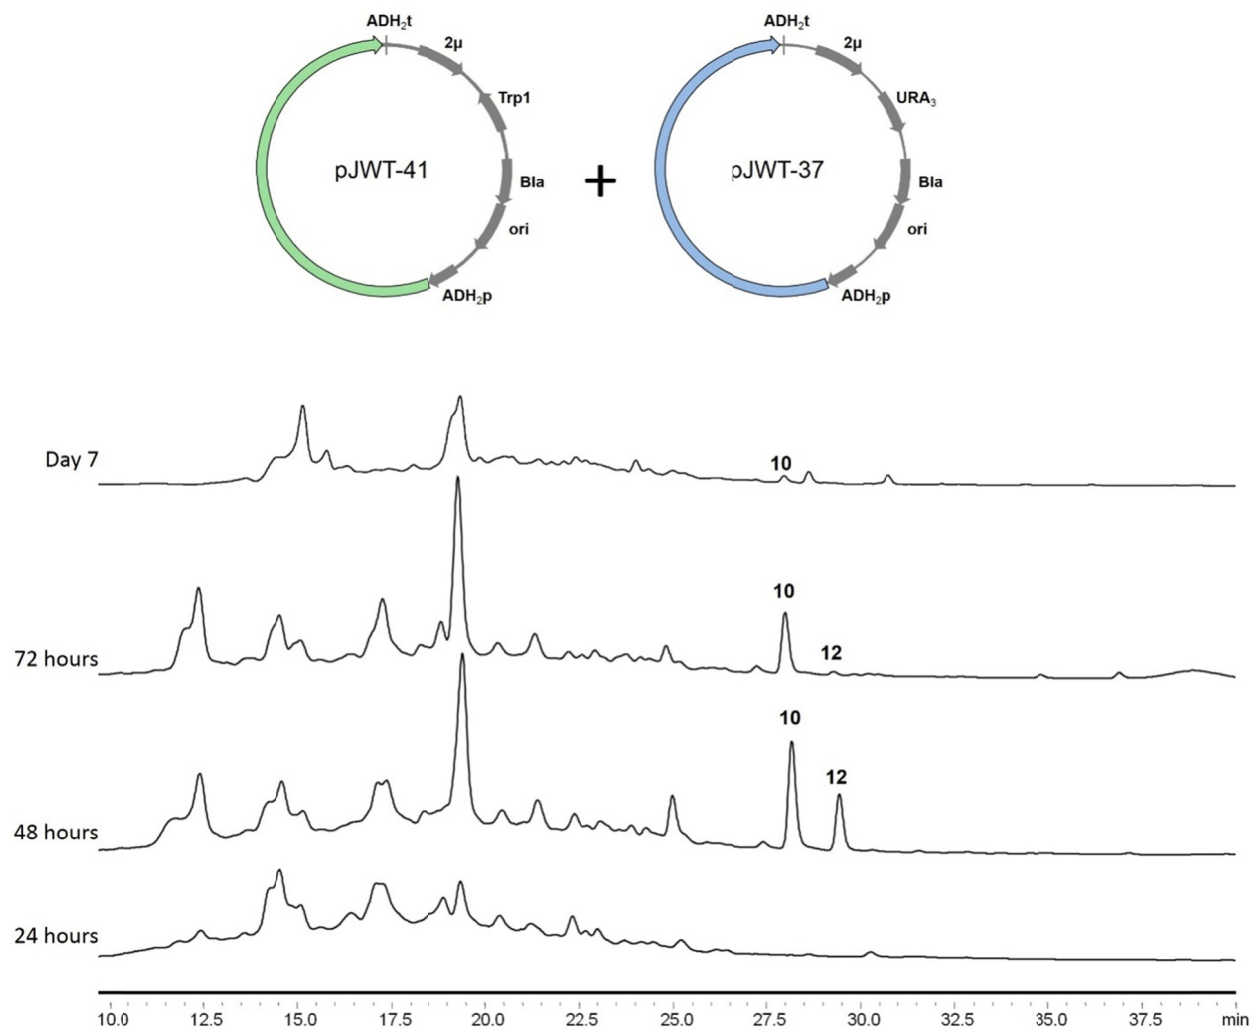

### Supplementary Figure 8. Mass spectra data of 10 and 12

czc\_standard #284 RT: 4.88 AV: 1 NL: 1.48E7  
T: FTMS (1,2) - p ESI Full ms [150.00-1500.00]

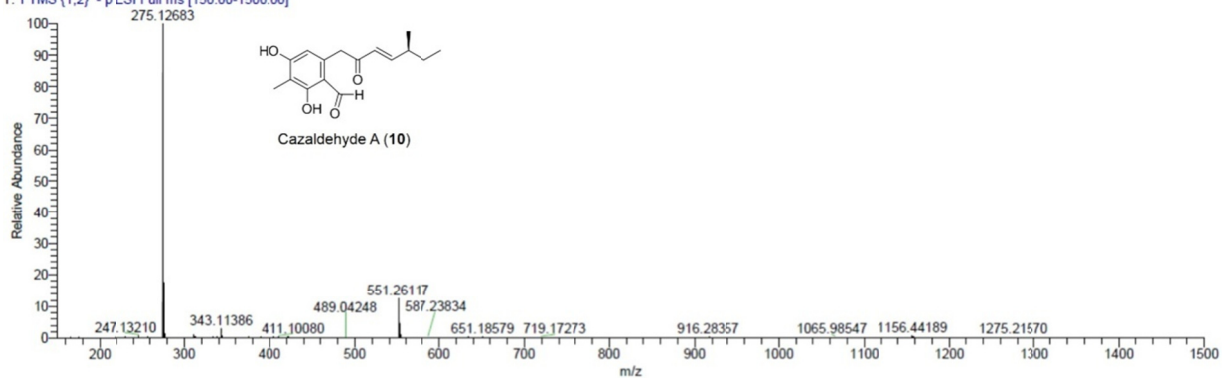

7641-1-4-2 (-) #306 RT: 4.92 AV: 1 NL: 4.38E7  
T: FTMS (1,2) - p ESI Full ms [150.00-1500.00]

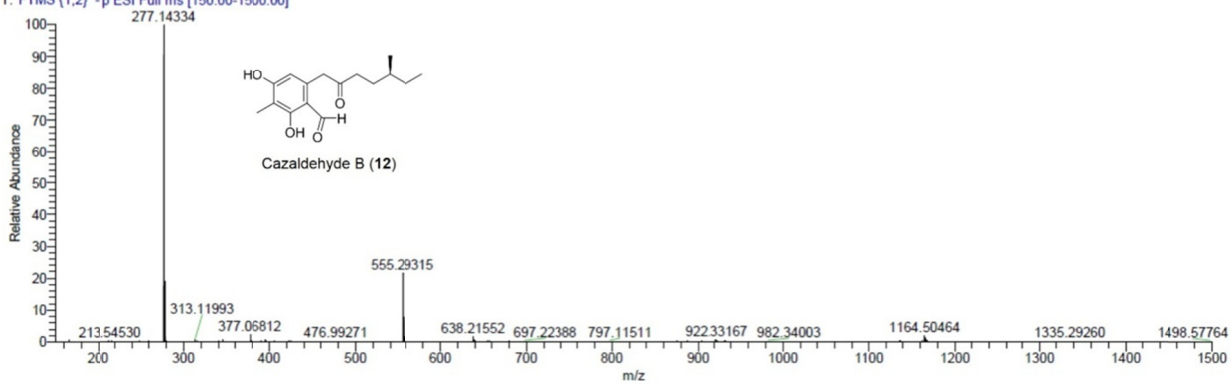

**Supplementary Table 3. Assignments of  $^{13}\text{C}$  and  $^1\text{H}$  NMR data for calzaldehde A (**10**)**

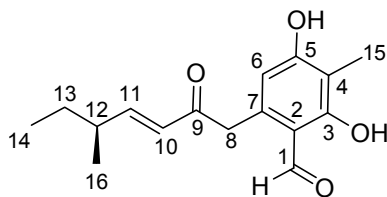

| Position <sup>[a]</sup> | $\delta\text{C}$ ppm <sup>[b]</sup> | $\delta\text{H}$ (ppm) <sup>[c]</sup> (J, Hz) | $^1\text{H}$ - $^1\text{H}$ COSY | $^1\text{H}$ - $^{13}\text{C}$ HMBC |
|-------------------------|-------------------------------------|-----------------------------------------------|----------------------------------|-------------------------------------|
| 1                       | 192.7                               | 9.82 (s)                                      |                                  | 2, 3                                |
| 2                       | 113                                 |                                               |                                  |                                     |
| 3                       | 161.5                               |                                               |                                  |                                     |
| 4                       | 111.2                               |                                               |                                  |                                     |
| 5                       | 164.5                               |                                               |                                  |                                     |
| 6                       | 110.8                               | 6.15 (s)                                      |                                  | 4, 8                                |
| 7                       | 137.2                               |                                               |                                  |                                     |
| 8                       | 43.6                                | 4.05 (s)                                      |                                  | 6, 7, 9                             |
| 9                       | 197.4                               |                                               |                                  |                                     |
| 10                      | 127.3                               | 6.2 (d, 16.0)                                 | 11                               | 9, 12                               |
| 11                      | 155.6                               | 6.94 (d.d. 16.4, 8.4)                         | 10, 12                           | 9, 12, 13, 16                       |
| 12                      | 38.7                                | 2.28 (m)                                      | 11, 13, 16                       | 11                                  |
| 13                      | 28.9                                | 1.45 (m)                                      | 12, 14                           | 15                                  |
| 14                      | 11.8                                | 0.9 (t, 7.2)                                  | 13                               | 12, 13                              |
| 15                      | 7.1                                 | 2.04 (s)                                      |                                  | 3, 4                                |
| 16                      | 19                                  | 1.09 (d, 7.2)                                 | 12                               | 11, 12, 13                          |
| 3-OH                    |                                     | 12.7 (s)                                      |                                  | 3,4                                 |
| 5-OH                    |                                     | 6.5 (br, s)                                   |                                  |                                     |

[a] The numbering scheme for **10** was adopted from reference<sup>3</sup>; [b]  $^{13}\text{C}$  NMR spectral data was taken at 100 MHz in  $\text{CDCl}_3$ ; [c]  $^1\text{H}$  NMR spectral data was taken at 400 MHz in  $\text{CDCl}_3$ .



Supplementary Figure 9.  $^1\text{H}$  NMR spectrum (400 MHz) of calaldehyde A (**10**) in  $\text{CDCl}_3$

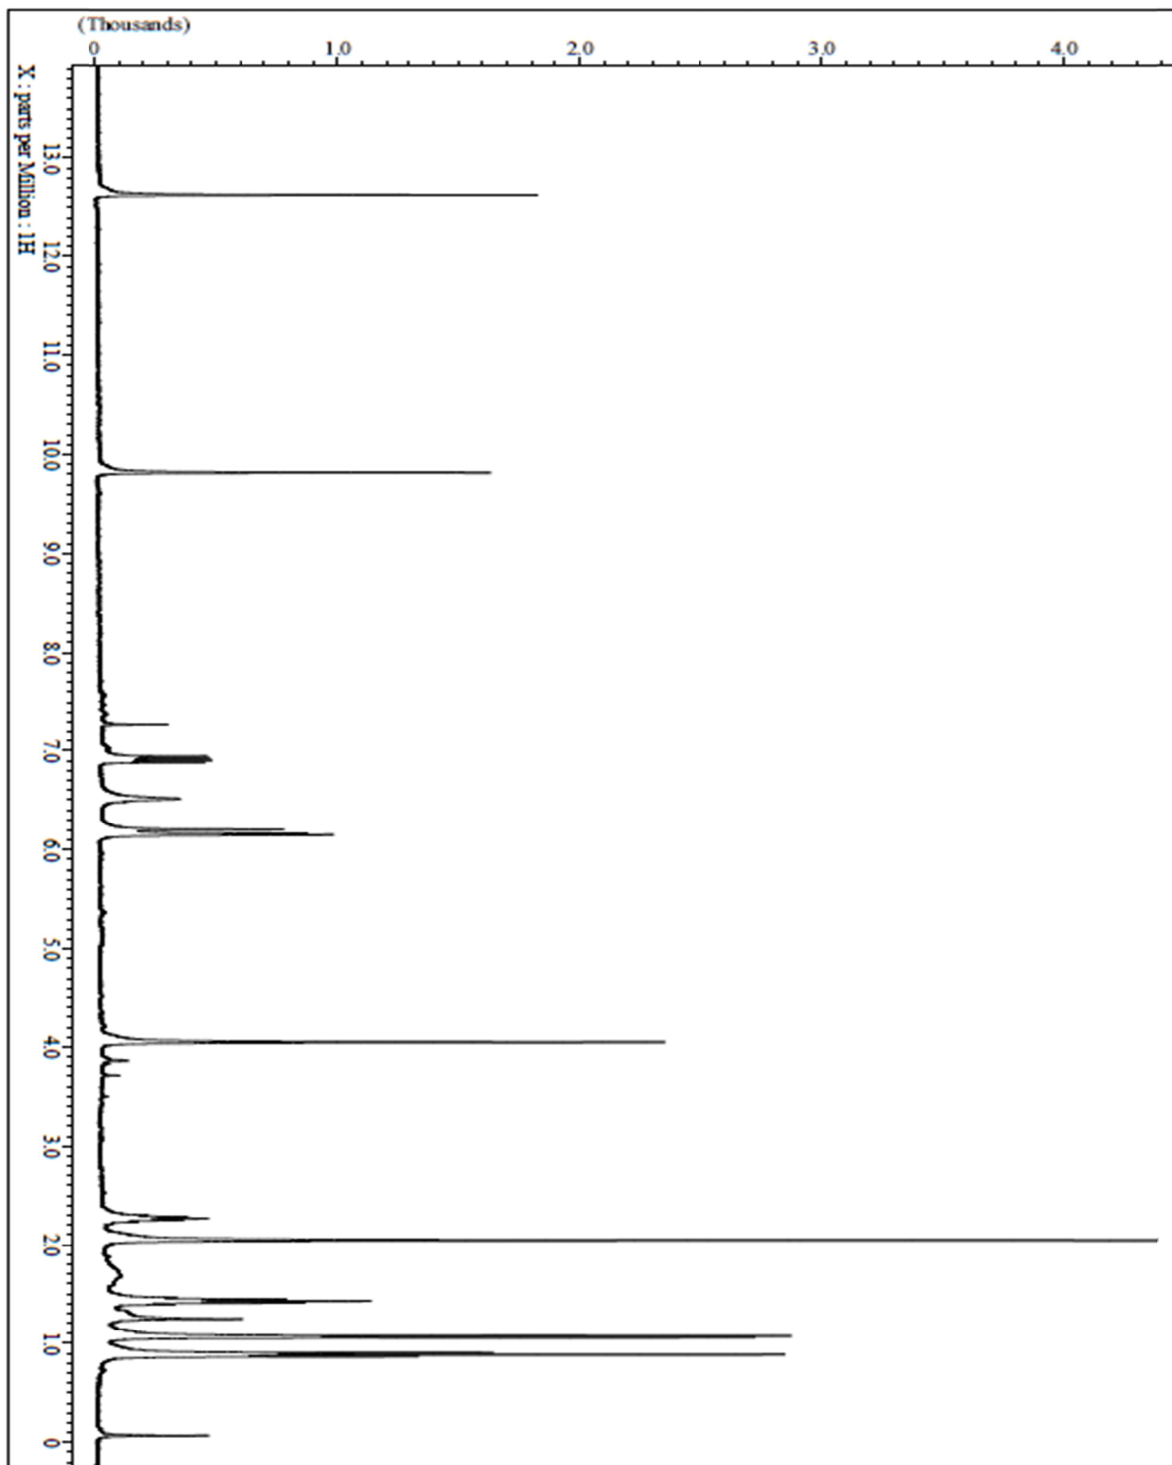

Supplementary Figure 10.  $^{13}\text{C}$  NMR spectrum (100 MHz) of calaldehyde A (**10**) in  $\text{CDCl}_3$

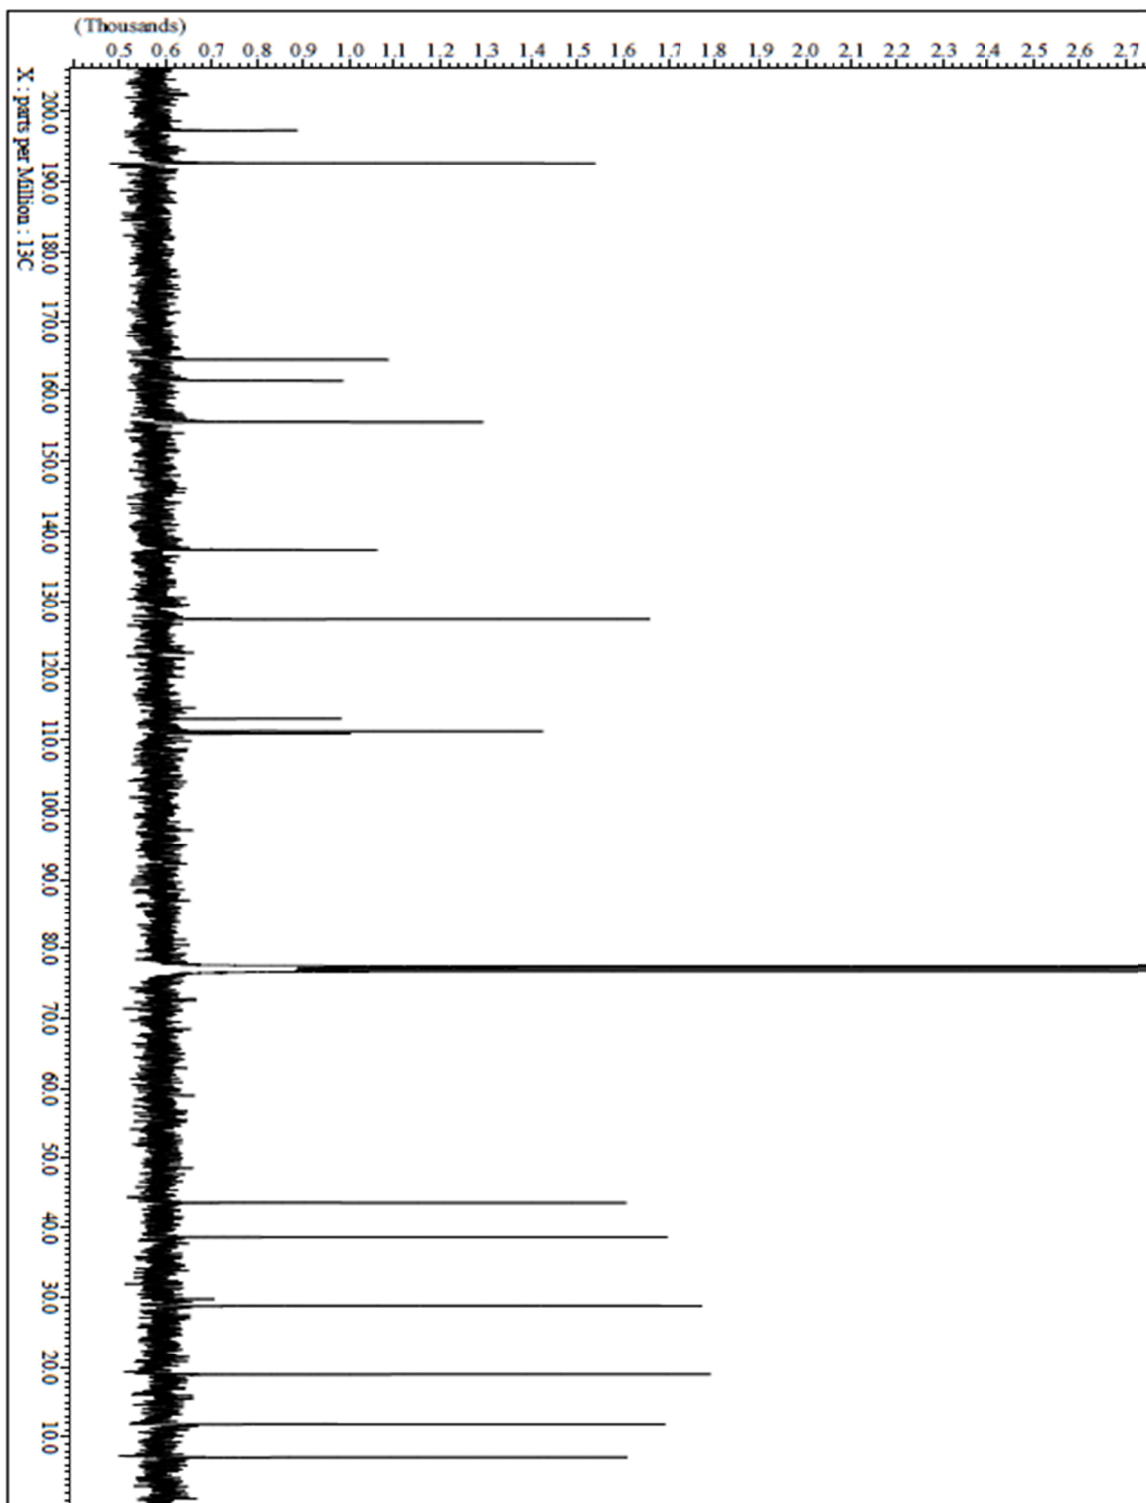

**Supplementary Figure 11.**  $^1\text{H}$ - $^1\text{H}$  COSY NMR spectrum (400 MHz) of calzaldehde A (**10**) in  $\text{CDCl}_3$

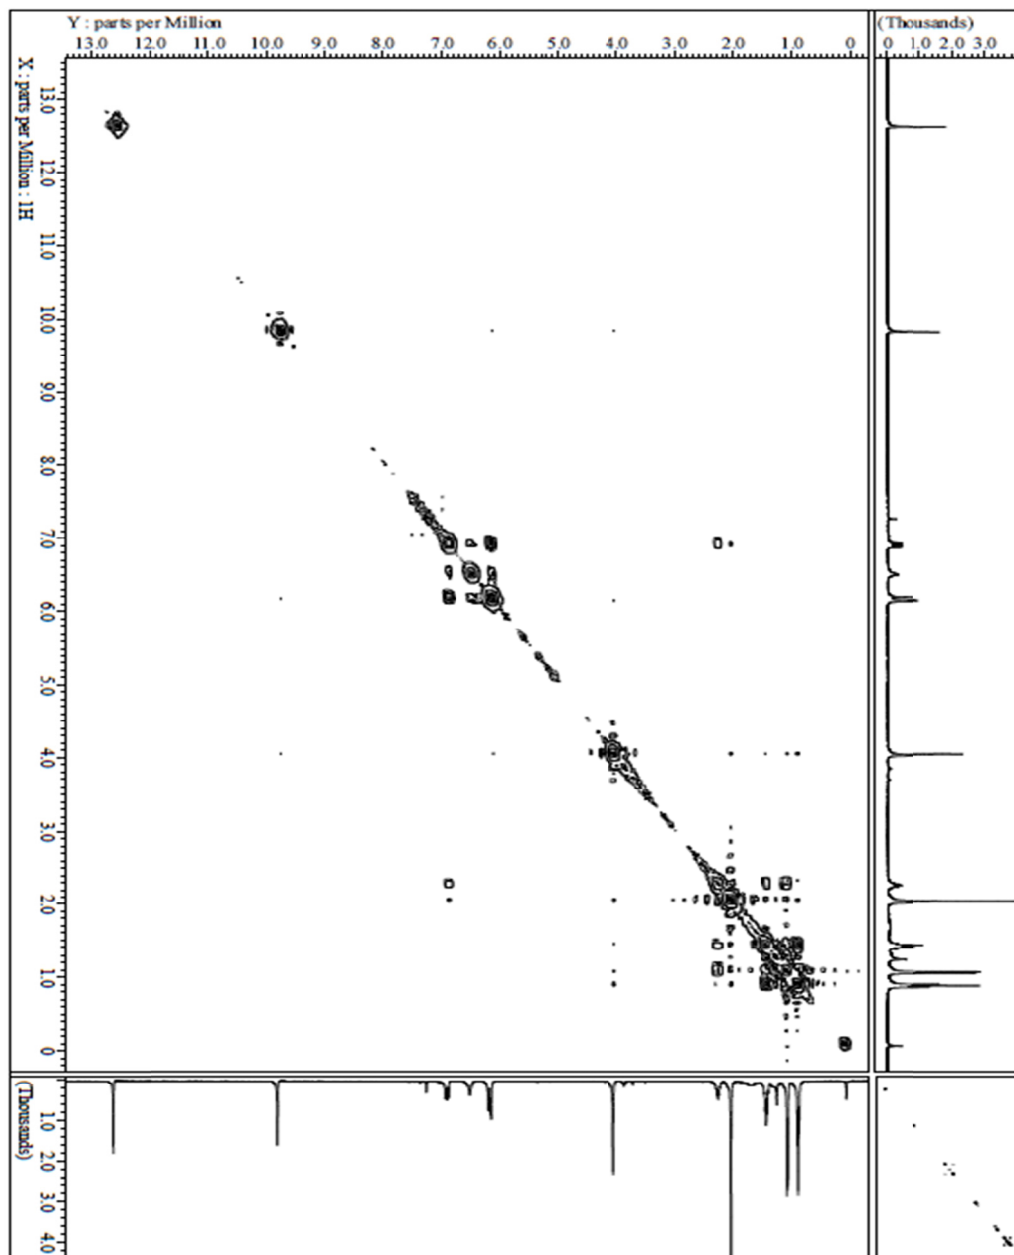

**Supplementary Figure 12.**  $^1\text{H}$ - $^{13}\text{C}$  HMBC NMR spectrum (400 MHz) of calaldehyde A (**10**) in  $\text{CDCl}_3$

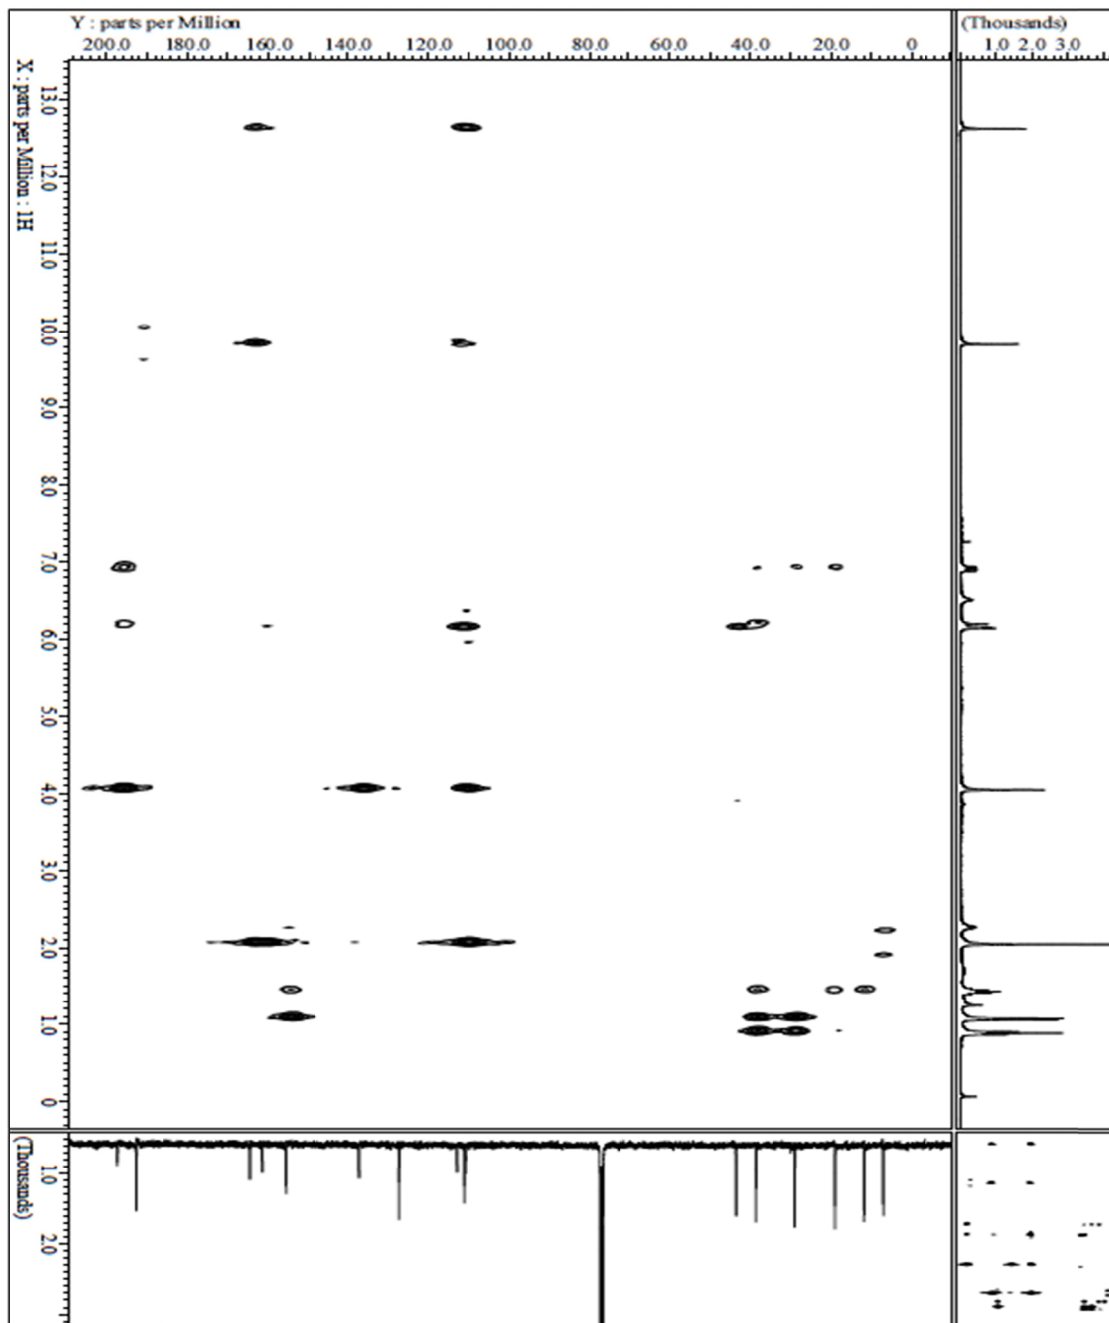

**Supplementary Table 4. Assignments of  $^{13}\text{C}$  and  $^1\text{H}$  NMR data for calzaldehedeB (**12**)**

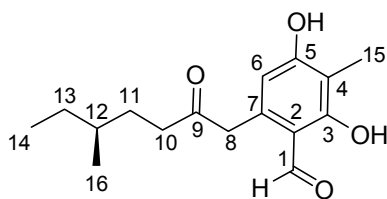

| Position <sup>[a]</sup> | $\delta\text{C ppm}^{[b]}$ | $\delta\text{H (ppm)}^{[c]}$ (J, Hz) | $^1\text{H}-^1\text{H}$ COSY | $^1\text{H}-^{13}\text{C}$ HMBC |
|-------------------------|----------------------------|--------------------------------------|------------------------------|---------------------------------|
| 1                       | 192.9                      | 9.87 (s)                             |                              | 3, 7                            |
| 2                       | 137.3                      |                                      |                              |                                 |
| 3                       | 164.5                      |                                      |                              |                                 |
| 4                       | 110.6                      |                                      |                              |                                 |
| 5                       | 161.0                      |                                      |                              |                                 |
| 6                       | 110.7                      | 6.20 (s)                             |                              | 7, 8                            |
| 7                       | 113.2                      |                                      |                              |                                 |
| 8                       | 46.0                       | 3.91 (s)                             |                              | 2, 6, 9                         |
| 9                       | 207.6                      |                                      |                              |                                 |
| 10                      | 40.5                       | 2.52 (d,d, 15.4, 7.3)                | 11                           | 9, 11, 12                       |
| 11                      | 30.4                       | 1.62 (m)                             | 10, 12                       | 10, 12, 13, 16                  |
| 12                      | 34.1                       | 1.30 (m)<br>1.33 (m)                 | 11, 13, 16                   | 10, 11, 13, 16                  |
| 13                      | 29.4                       | 1.40 (m)                             | 12, 14                       | 11, 12, 14, 16                  |
| 14                      | 11.4                       | 1.14 (m)<br>0.86 (t, 7.6)            | 13                           | 12                              |
| 15                      | 7.10                       | 2.09 (s)                             |                              | 3, 4, 5                         |
| 16                      | 19.1                       | 0.84 (d, 6.1)                        | 12                           | 11, 12                          |
| 3-OH                    |                            | 12.7 (s)                             |                              | 3,4                             |
| 5-OH                    |                            | 5.7 (br s)                           |                              |                                 |

[a] The numbering scheme for **12** was adopted from reference<sup>3</sup>; [b]  $^{13}\text{C}$  NMR spectral data was taken at 100 MHz in  $\text{CDCl}_3$ ; [c]  $^1\text{H}$  NMR spectral data was taken at 400 MHz in  $\text{CDCl}_3$ .

**Supplementary Figure 13.**  $^1\text{H}$  NMR spectrum (400 MHz) of calaldehyde B (**12**) in  $\text{CDCl}_3$

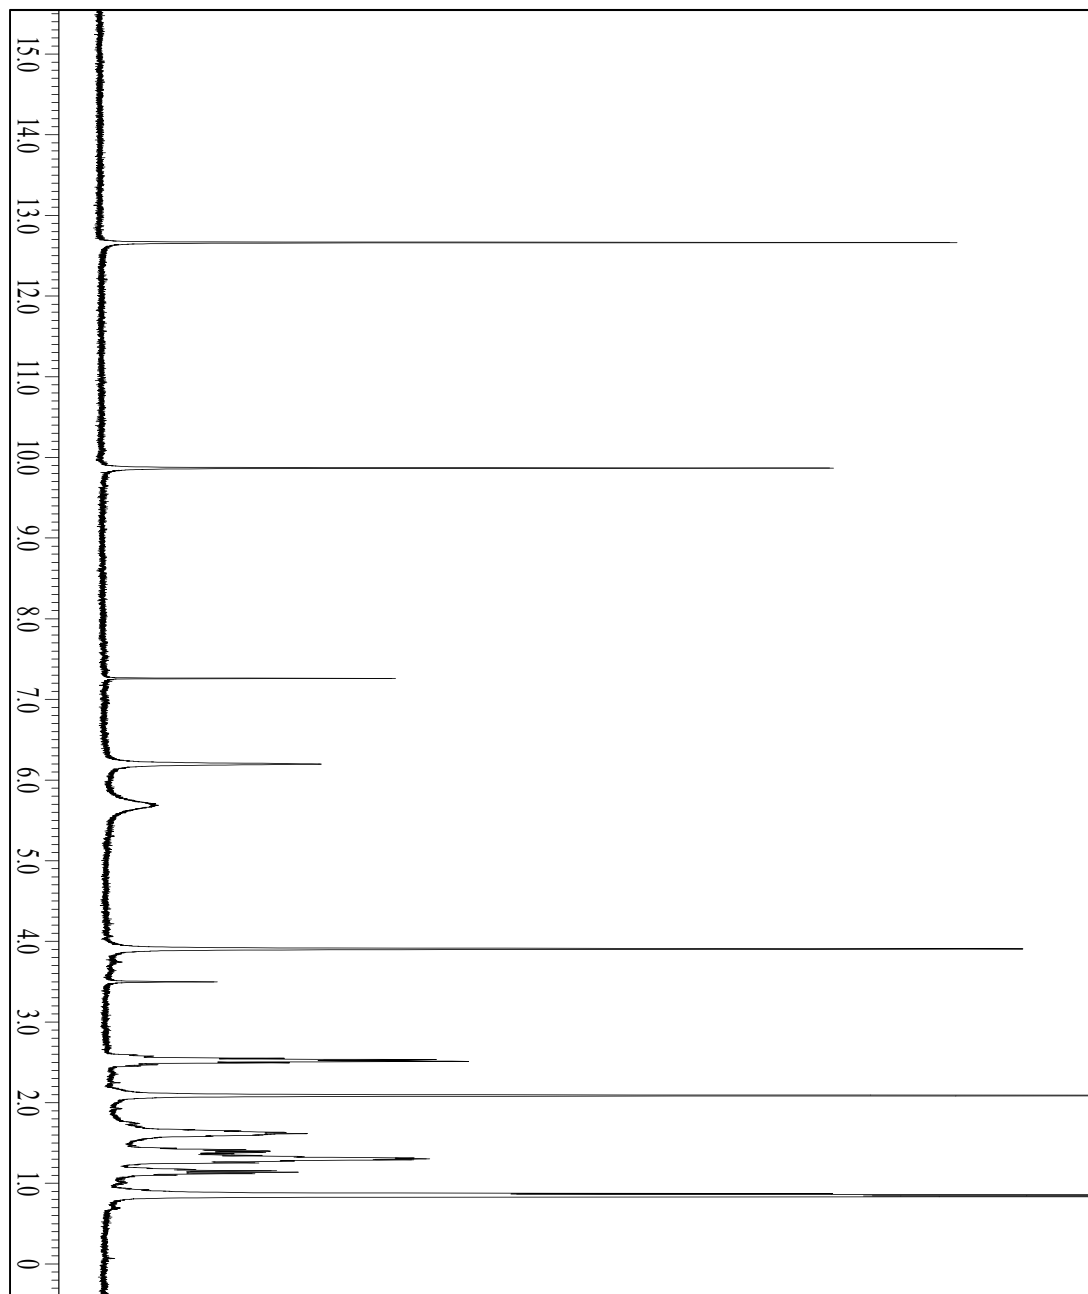

**Supplementary Figure 14.**  $^{13}\text{C}$  NMR spectrum (100 MHz) of calaldehydeB (**12**) in  $\text{CDCl}_3$

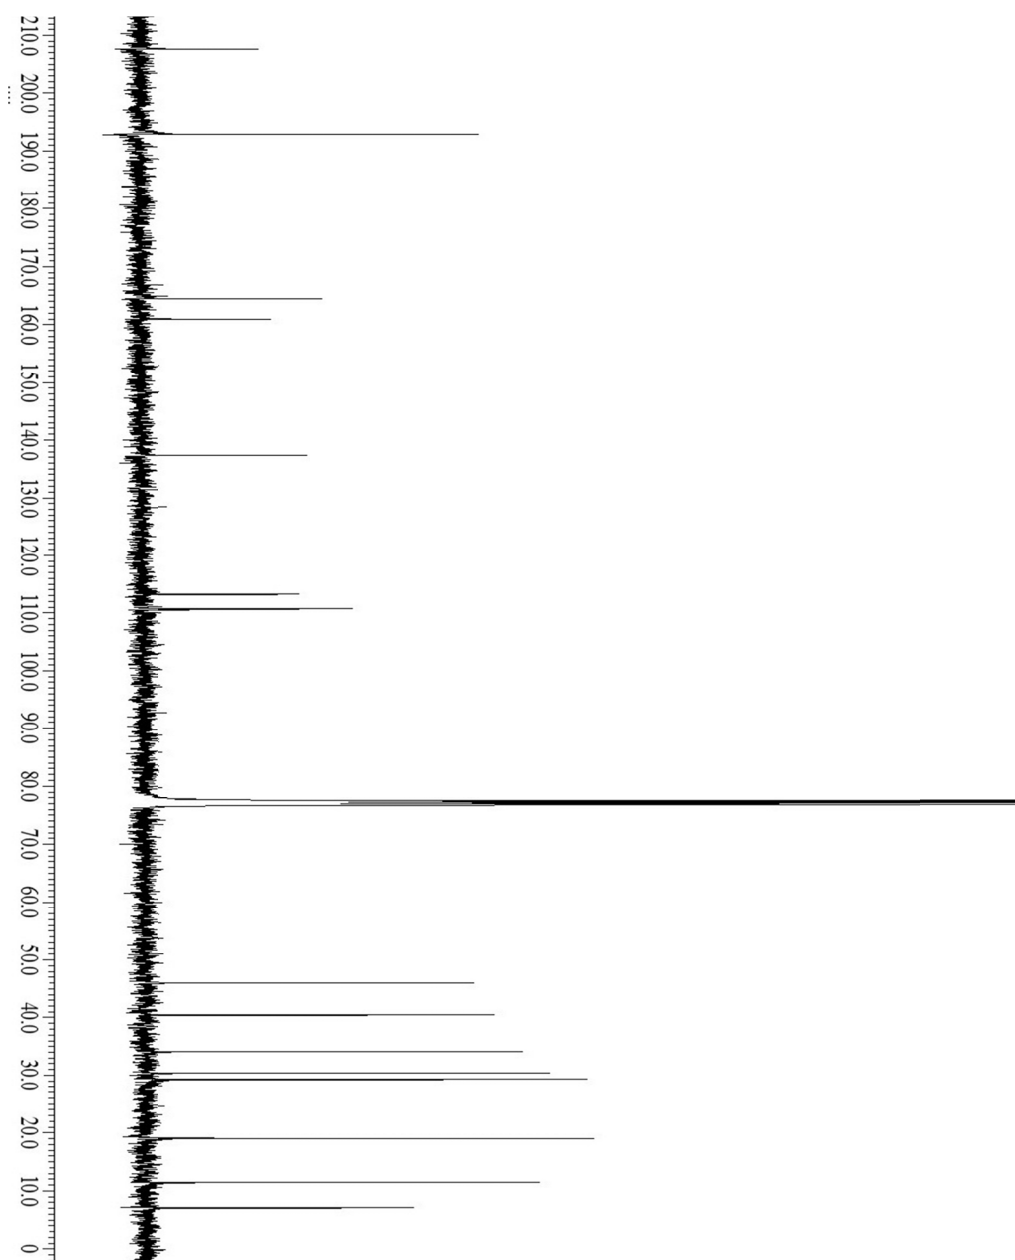

**Supplementary Figure 15.**  $^1\text{H}$ - $^1\text{H}$  COSY NMR spectrum (400 MHz) of calaldehyde B (**12**) in  $\text{CDCl}_3$

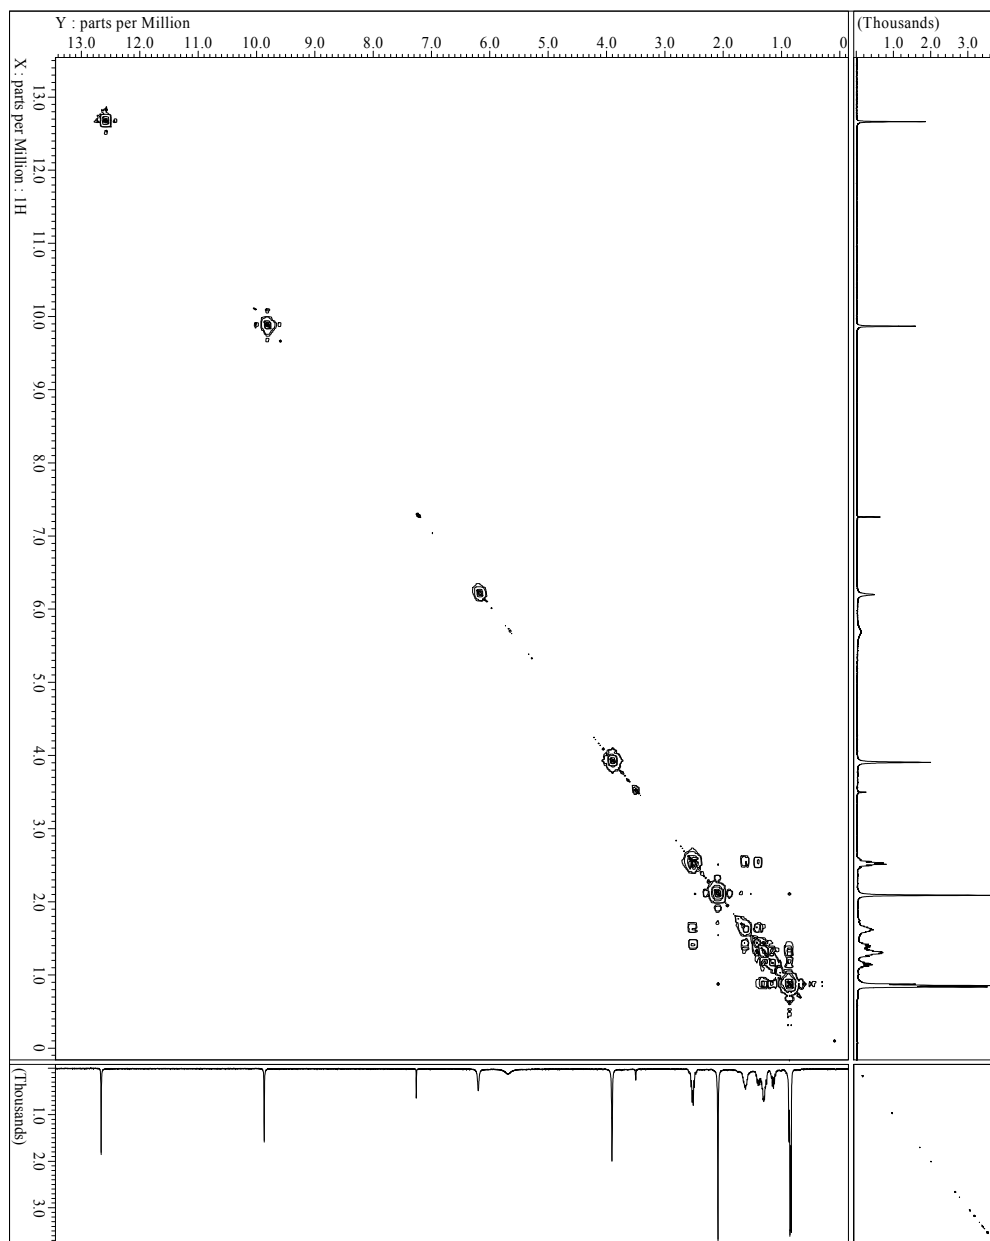



**Supplementary Figure 16.**  $^1\text{H}$ - $^{13}\text{C}$  HMBC NMR spectrum (400 MHz) of caldehyde **12** in  $\text{CDCl}_3$

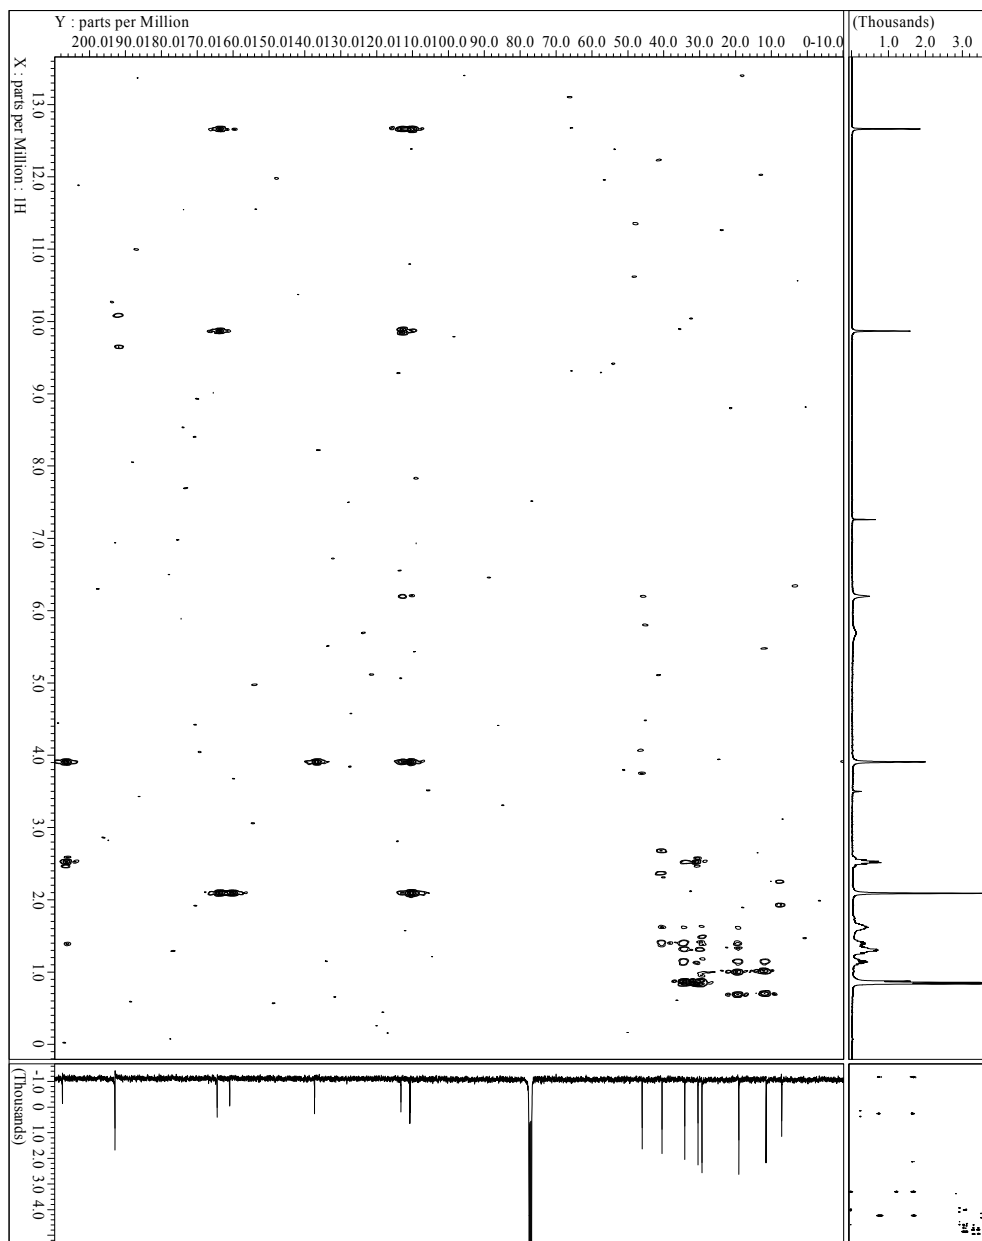

**Supplementary Figure 17.** *CazaldehydeA (10) reduction assay.* i) No reduction of **10** was observed when the compound was incubated with 2 mM NADPH indicating the reduction is enzymatic; ii) No reduction of **10** was observed when the compound was incubated with the standalone wild-type SAT domain in the presence of NADPH indicating that the SAT domain did not catalyze the observed reduction; iii) Reduction of **10** to **12** was observed after **10** was incubated with CazM in the presence of NADPH indicating that the observed reduction most likely takes place via the R domain. HPLC traces are shown in the same scale and at  $\lambda = 290$  nm.

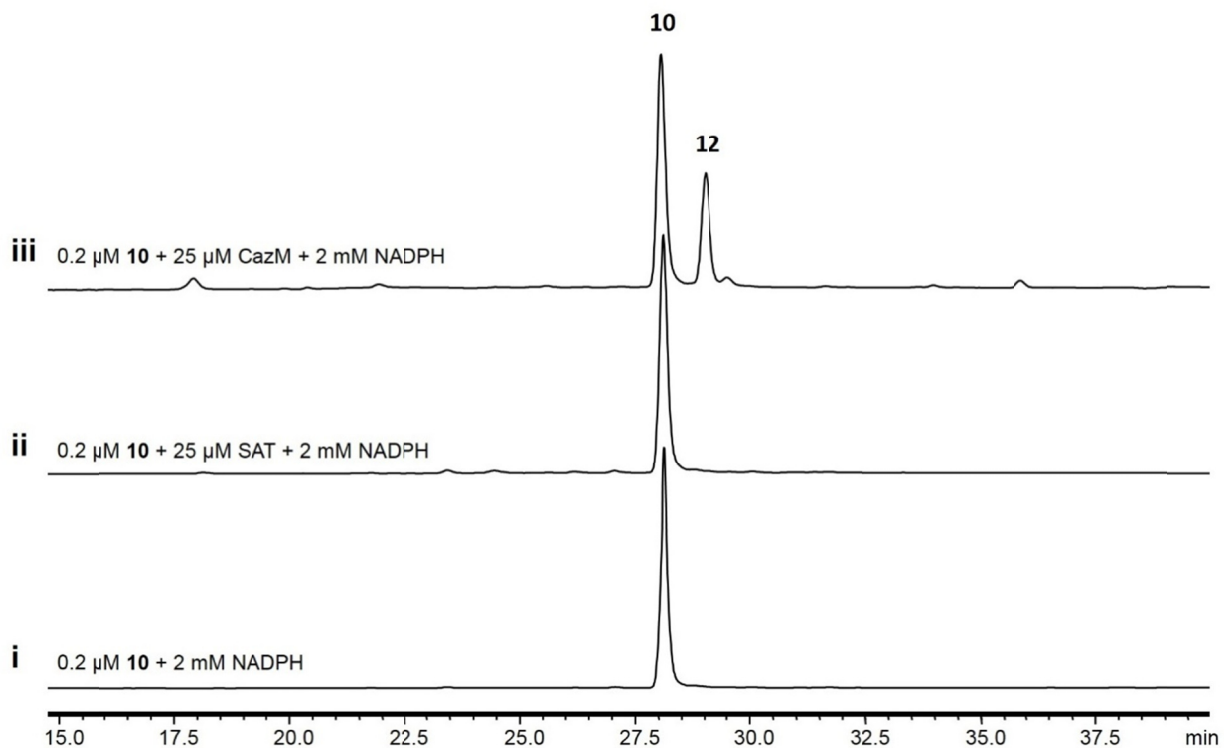

**Supplementary Figure 18.** Alignment of the apo and hexanoyl-bound SAT structures. The structures are shown as cartoons where the apo (4R05) is colored magenta and the hexanoyl-bound (4RPM) SAT is colored in light purple. Hexanoyl is shown as ball and stick. The structures were analyzed using PyMOL.<sup>5</sup>

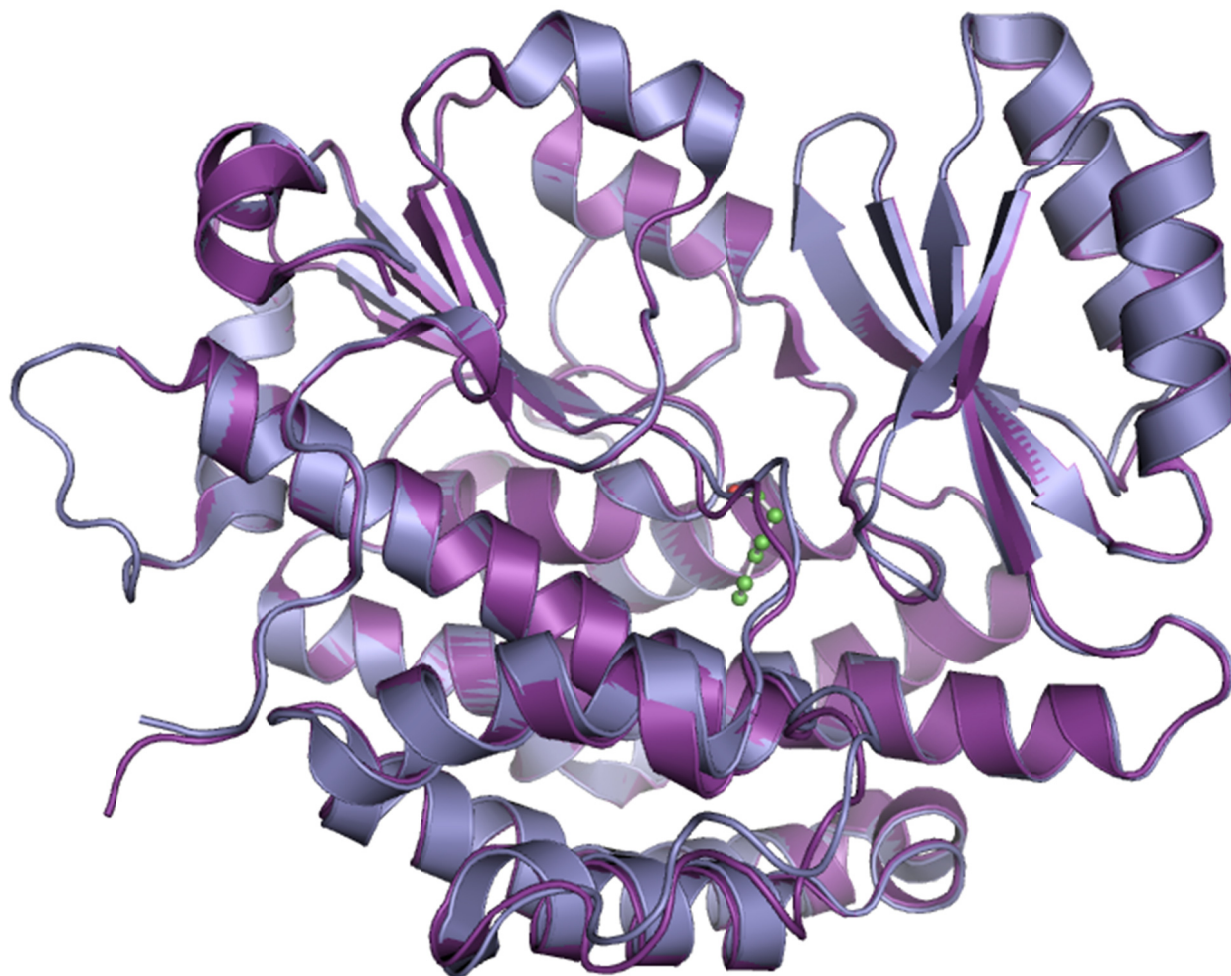

**Supplementary Figure 19.** Crystal structures of malonyl-CoA:ACP transacylases, acyltransferase domains and trans-acyltransferases. A) Acyltransferase from module 3 of 6-deoxyerythronolide B synthase (2QO3).<sup>6</sup> B) Acyltransferase from module 5 of 6-deoxyerythronolide B synthase (2HG4).<sup>7</sup> C) Acyltransferase from PKS13 (3TZW).<sup>8</sup> D) Malonyl-CoA:ACP transacylase from *Streptomyces coelicolor* A3(2) (1NM2).<sup>9</sup> E) Malonyl-CoA:ACP transacylase from *Helicobacter pylori* (2H1Y).<sup>10</sup> F) Malonyl-CoA:ACP transacylase from *Xanthomonas oryzae* pv. *Oryzae* KACC10331 (3R97).<sup>11</sup> G) Acyltransferase from zwittermicin polyketide synthase ZmaA (4QBU).<sup>12</sup> H) Acyltransferase from the enediyne polyketide synthase Dyn<sub>10</sub> (4AMM).<sup>13</sup> I) Trans-acyltransferase involved in disorazole synthesis (3RGI).<sup>14</sup> Each structure is shown as a cartoon and helices corresponding to  $\alpha$ J and  $\alpha$ P in the SAT structure are highlighted in teal. The active site Ser residues for each structure is shown as a stick. The structures were analyzed using PyMOL.<sup>5</sup>

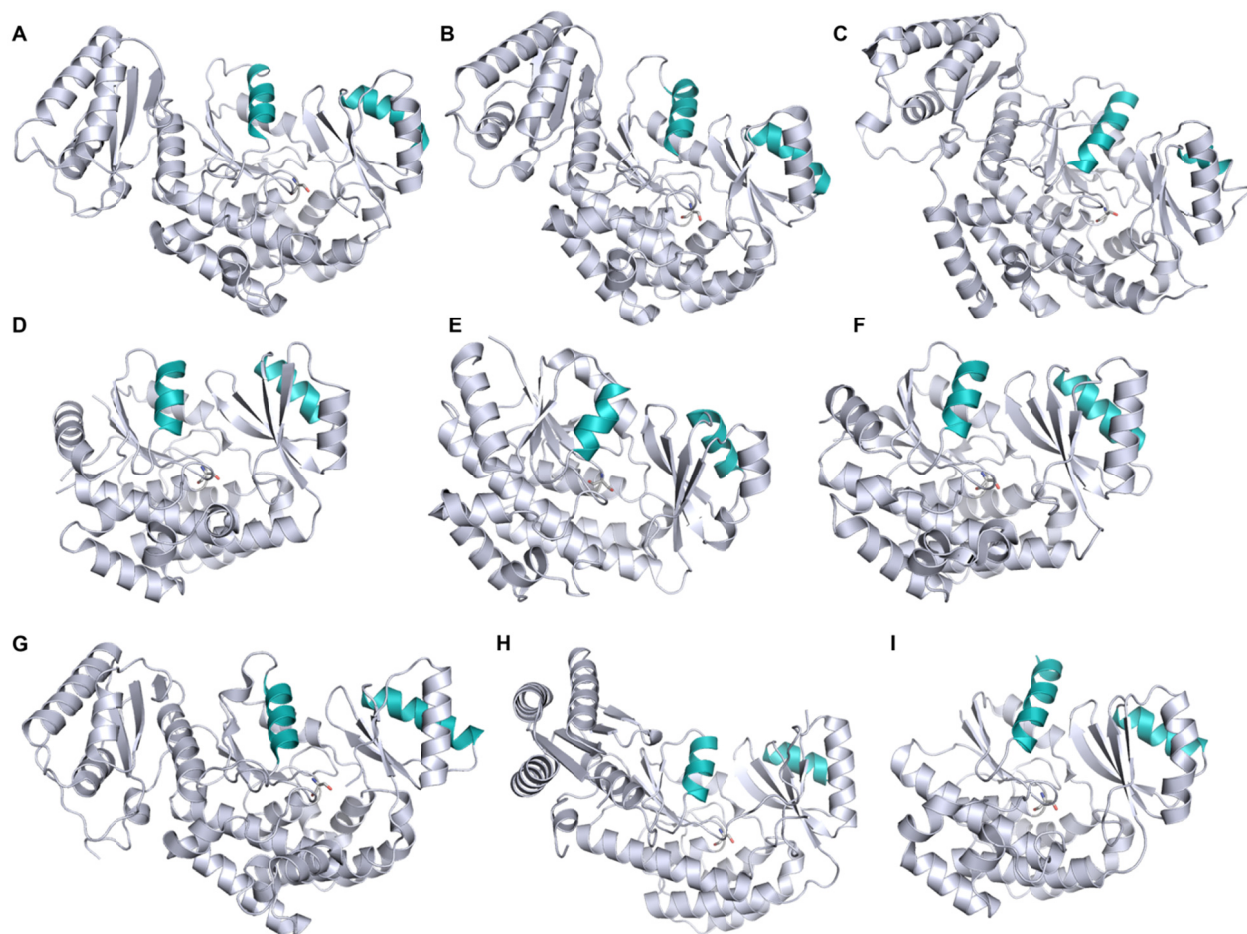

**Supplementary Table 5. X-ray data collection and refinement statistics for the SAT domain**

|                                                          | <b>SeMethionine<br/>apo SAT</b>               | <b>SeMethionine<br/>Hexanoyl-SAT</b>          |
|----------------------------------------------------------|-----------------------------------------------|-----------------------------------------------|
| <b>Data Collection</b>                                   |                                               |                                               |
| PDB accession code                                       | 4RO5                                          | 4RPM                                          |
| Space group                                              | P2 <sub>1</sub> 2 <sub>1</sub> 2 <sub>1</sub> | P2 <sub>1</sub> 2 <sub>1</sub> 2 <sub>1</sub> |
| Unit cell dimensions                                     |                                               |                                               |
| $a=b=c$ (Å)                                              | 43.13, 52.16, 163.09                          | 45.67,52.36,168.03                            |
| $\alpha=\beta=\gamma$ (°)                                | 90.0                                          | 90.0                                          |
| Reflections observed                                     | 156783                                        | 283472                                        |
| Unique reflections                                       | 87226                                         | 79353                                         |
| Wavelength (Å)                                           | 0.9792                                        | 0.9789                                        |
| Resolution (Å)                                           | 81.5-1.9                                      | 84.0-1.4                                      |
| Highest Resolution Shell (Å) <sup>a</sup>                | 1.64-1.60                                     | 1.44-1.40                                     |
| R <sub>sym</sub> (%) <sup>b</sup>                        | 4.7(26.4)                                     | 4.9(53.9)                                     |
| CC(1/2)                                                  | 98.8(85.5)                                    | 99.8(80.0)                                    |
| I/σ                                                      | 11.53(2.98)                                   | 12.79(2.01)                                   |
| Completeness (%)                                         | 92.7(88.1)                                    | 98.5(96.6)                                    |
| Wilson B value (Å**2)                                    | 12.8                                          | 16.2                                          |
| <b>Refinement</b>                                        |                                               |                                               |
| Resolution (Å)                                           | 81.5-1.60                                     | 84.0-1.4                                      |
| Resolution (Å)<br>(last shell)                           | 1.63-1.60                                     | 1.42-1.40                                     |
| Reflections Used                                         | 48603                                         | 79350                                         |
| R <sub>work</sub> (%)/R <sub>free</sub> (%) <sup>c</sup> | 18.7(20.0)<br>21.8(25.0)                      | 18.7(25.86)<br>20.4( 27.33)                   |
| Protein Molecules in Asymmetric Unit                     | 1                                             | 1                                             |
| Number of non-H atoms                                    |                                               |                                               |
| Protein                                                  | 2989                                          | 3040                                          |
| Non-protein                                              | 189                                           | 185                                           |
| RMS deviations                                           |                                               |                                               |
| Bond lengths (Å)                                         | 0.006                                         | 0.006                                         |
| Bond angles (°)                                          | 1.067                                         | 1.018                                         |
| Average B-factor (Å <sup>2</sup> )                       |                                               |                                               |
| Protein atoms                                            | 15.37                                         | 22.29                                         |
| Non-protein atoms                                        | 19.70                                         | 26.9                                          |
| Ramachandran plot regions <sup>d</sup>                   |                                               |                                               |
| Favored                                                  | 99.22                                         | 98.74                                         |
| Allowed                                                  | 0.78                                          | 1.26                                          |
| Outliers                                                 | 0.0                                           | 0.0                                           |

<sup>a</sup> Highest resolution shell shown in parenthesis. <sup>b</sup>  $R_{sym} = 100 \times \sum (I - I(\text{mean}))^2 / \sum I^2$  where  $I$  is the observed intensity of the reflection HKL and the sum is taken over all reflections

HKL. <sup>c</sup> *Rfactor* =  $100 \times \frac{\sum \left| |F_{obs}| - |F_{calc}| \right|}{\sum |F_{obs}|}$  and  $F_{obs}$  are the calculated and observed structure factor amplitudes, respectively.  $R_{work}$  refers to the  $R_{factor}$  for the data utilized in the refinement and  $R_{free}$  refers to the  $R_{factor}$  for 5% of the reflections randomly chosen that were excluded from the refinement. <sup>d</sup>Percentage of residues in Ramachandran plot regions were determined using MOLPROBITY.<sup>15</sup>

## Supplementary References

- (1) Lee, K. K.; Da Silva, N. A.; Kealey, J. T. *Anal. Biochem.* **2009**, *394*, 75.
- (2) Keszenman-Pereyra, D.; Lawrence, S.; Twfieg, M. E.; Price, J.; Turner, G. *Curr. Genet. Soc.* **2003**, *43*, 186.
- (3) Winter, J. M.; Sato, M.; Sugimoto, S.; Chiou, G.; Garg, N. K.; Tang, Y. *J. Am. Chem. Soc.* **2012**, *134*, 17900.
- (4) Sambrook, J.; Fritsch, E. F.; Maniatis, T. *Molecular Cloning, a Laboratory Manual* Cold Spring Harbor Laboratory: Cold Spring Harbor, NY, 1989.
- (5) DeLano, W. L. *The PyMOL User's Manual* **2002**, DeLano Scientific, San Carlos, CA, USA.
- (6) Tang, Y.; Chen, A. Y.; Kim, C-Y.; Cane, D. E.; Khosla, C. *Chem. Biol.* **2007**, *14*, 931.
- (7) Tang, Y.; Kim, C-Y.; Mathews, I. I.; Cane, D. E.; Khosla, C. *Proc. Natl. Acad. Sci. USA.* **2006**, *103*, 11124.
- (8) Bergeret, F.; Gavalda, S.; Chalut, C.; Malaga, W.; Quémard, A.; Pedelacq, J-D.; Daffé, M.; Guilhot, C.; Mourey, L.; Bon, C. *J. Biol. Chem.* **2012**, *287*, 33675.
- (9) Keatinge-Clay, A. T.; Shelat, A. A.; Savage, D. F.; Tsai, S-C.; Miercke, L. J. W.; O'Connell III, J. D.; Khosla, C.; Stroud, R. M. *Structure.* **2003**, *11*, 147.
- (10) Zhang, L.; Liu, W.; Xiao, J.; Hu, T.; Chen, J.; Chen, K.; Jiang, H.; Shen, X. *Protein Sci.* **2007**, *16*, 1184.
- (11) Natarajan, S.; Kim, J-K.; Jung, T-K.; Doan, T. T. N.; Ngo, H-P-T.; Hong, M-K.; Kim, S.; Tan, V. P.; Ahn, S. J.; Lee, S. H.; Han, Y.; Ahn, Y-J.; Kang, L-W. *Mol. Cells.* **2012**, *33*, 19.
- (12) Park, H.; Keavany, B. M.; Dyer, D. H.; Thomas, M. G.; Forest, K. T. *PLoS One.* **2014**, *9*, e110965.
- (13) Liew, C. W.; Nilsson, M.; Chen, M. W.; Sun, H.; Cornvik, T.; Liang, Z-X.; Lescar, J. *J. Biol. Chem.* **2012**, *287*, 23203.
- (14) Wong, F. T.; Jin, X.; Mathews, I. I.; Cane, D. E.; Khosla, C. *Biochemistry.* **2011**, *50*, 6539.
- (15) Chen, V. B. W.; Arendall, B.; Headd, J. F.; Keedy, D. A.; Immormino, R. M.; Kapral, G. J.; Murray, L. W.; Richardson, J. S.; Richardson, D. C. *Acta Cryst.* **2010**, *D66*, 12.
